# 1 SARS-CoV-2 spike P681R mutation enhances and accelerates viral fusion

2

3 Akatsuki Saito<sup>1,2,3,16</sup>, Hesham Nasser<sup>4,5,16</sup>, Keiya Uriu<sup>6,16</sup>, Yusuke Kosugi<sup>6,16</sup>, Takashi  
4 Irie<sup>7,16</sup>, Kotaro Shirakawa<sup>8</sup>, Kenji Sadamasu<sup>9</sup>, Izumi Kimura<sup>6</sup>, Jumpei Ito<sup>6</sup>, Jiaqi  
5 Wu<sup>10,11</sup>, Seiya Ozono<sup>12</sup>, Kenzo Tokunaga<sup>12</sup>, Erika P Butlertanaka<sup>1</sup>, Yuri L Tanaka<sup>1</sup>,  
6 Ryo Shimizu<sup>4,13</sup>, Kenta Shimizu<sup>14</sup>, Takasuke Fukuhara<sup>14</sup>, Ryoko Kawabata<sup>7</sup>,  
7 Takemasa Sakaguchi<sup>7</sup>, Isao Yoshida<sup>9</sup>, Hiroyuki Asakura<sup>9</sup>, Mami Nagashima<sup>9</sup>,  
8 Kazuhisa Yoshimura<sup>9</sup>, Yasuhiro Kazuma<sup>8</sup>, Ryosuke Nomura<sup>8</sup>, Yoshihito Horisawa<sup>8</sup>,  
9 Akifumi Takaori-Kondo<sup>8</sup>, The Genotype to Phenotype Japan (G2P-Japan)  
10 Consortium, So Nakagawa<sup>10,11\*</sup>, Terumasa Ikeda<sup>4\*</sup>, Kei Sato<sup>6,11,15,17\*</sup>.

11

12 <sup>1</sup> Department of Veterinary Science, Faculty of Agriculture, University of Miyazaki,  
13 Miyazaki 8892192, Japan

14 <sup>2</sup> Center for Animal Disease Control, University of Miyazaki, Miyazaki 8892192,  
15 Japan

16 <sup>3</sup> Graduate School of Medicine and Veterinary Medicine, University of Miyazaki,  
17 Miyazaki 8892192, Japan

18 <sup>4</sup> Division of Molecular Virology and Genetics, Joint Research Center for Human  
19 Retrovirus infection, Kumamoto University, Kumamoto 8600811, Japan

20 <sup>5</sup> Department of Clinical Pathology, Faculty of Medicine, Suez Canal University,  
21 Ismailia 41511, Egypt

22 <sup>6</sup> Division of Systems Virology, Department of Infectious Disease Control,  
23 International Research Center for Infectious Diseases, The Institute of Medical  
24 Science, The University of Tokyo, Tokyo 1088639, Japan

25 <sup>7</sup> Institute of Biomedical and Health Sciences, Hiroshima University, Hiroshima  
26 7348551, Japan

27 <sup>8</sup> Department of Hematology and Oncology, Graduate School of Medicine, Kyoto  
28 University, Kyoto 6068507, Japan

29 <sup>9</sup> Tokyo Metropolitan Institute of Public Health, Tokyo 1690073, Japan

30 <sup>10</sup> Department of Molecular Life Science, Tokai University School of Medicine,  
31 Kanagawa 2591193, Japan

32 <sup>11</sup> CREST, Japan Science and Technology Agency, Saitama 3220012, Japan

33 <sup>12</sup> Department of Pathology, National Institute of Infectious Diseases, Tokyo  
34 1628640, Japan

35 <sup>13</sup> Graduate School of Medical Sciences, Kumamoto University, Kumamoto 8600811,  
36 Japan

37 <sup>14</sup> Department of Microbiology and Immunology, Graduate School of Medicine,  
38 Hokkaido University, Hokkaido 0608638, Japan

39 <sup>15</sup> Twitter: @SystemsVirology

40 <sup>16</sup> These authors contributed equally

41 <sup>17</sup> Lead Contact

42 \*Correspondences:

43 [so@tokai.ac.jp](mailto:so@tokai.ac.jp) (S.N.)

44 [ikedat@kumamoto-u.ac.jp](mailto:ikedat@kumamoto-u.ac.jp) (T.Ikeda)

45 [KeiSato@g.ecc.u-tokyo.ac.jp](mailto:KeiSato@g.ecc.u-tokyo.ac.jp) (K.Sato)

46

47 **Conflict of interest:** The authors declare that no competing interests exist.

48 **Short title:** A SARS-CoV-2 spike mutation promotes viral fusion (49/50 characters)

49 **Keywords:** SARS-CoV-2; COVID-19; spike protein; B.1.617; P681R; fusion

50

51 **Highlights** (85 characters including spaces)

52 ● P681R mutation is highly conserved in the B.1.617 lineages

53 ● P681R mutation accelerates and enhances SARS-CoV-2 S-mediated fusion

54 ● Promotion of viral fusion by P681R mutation is augmented by TMPRSS2

55 **Summary** (150/150 words)

56 During the current SARS-CoV-2 pandemic, a variety of mutations have been  
57 accumulated in the viral genome, and at least five variants of concerns (VOCs) have  
58 been considered as the hazardous SARS-CoV-2 variants to the human society. The  
59 newly emerging VOC, the B.1.617.2 lineage (delta variant), closely associates with  
60 a huge COVID-19 surge in India in Spring 2021. However, its virological property  
61 remains unclear. Here, we show that the B.1.617 variants are highly fusogenic and  
62 form prominent syncytia. Bioinformatic analyses reveal that the P681R mutation in  
63 the spike protein is highly conserved in this lineage. Although the P681R mutation  
64 decreases viral infectivity, this mutation confers the neutralizing antibody resistance.  
65 Notably, we demonstrate that the P681R mutation facilitates the furin-mediated  
66 spike cleavage and enhances and accelerates cell-cell fusion. Our data suggest that  
67 the P681R mutation is a hallmark characterizing the virological phenotype of this  
68 newest VOC, which may associate with viral pathogenicity.

## 69 **Introduction**

70 In December 2019, an unusual infectious disease, now called coronavirus disease  
71 2019 (COVID-19), emerged in Wuhan, Hubei province, China (Wu et al., 2020; Zhou  
72 et al., 2020). Severe acute respiratory syndrome coronavirus 2 (SARS-CoV-2), the  
73 causative agent of COVID-19, has rapidly spread all over the world, and as of June  
74 2021, SARS-CoV-2 is an ongoing pandemic: more than 170 million cases of  
75 infections have been reported worldwide, and more than 3.5 million people died of  
76 COVID-19 (WHO, 2021a).

77 During the current pandemic, SARS-CoV-2 has acquired a variety of  
78 mutations [reviewed in (Plante et al., 2021)]. First, in the spring of 2020, a SARS-  
79 CoV-2 derivative harboring the D614G mutation in its spike (S) protein has emerged  
80 and quickly become predominant (Korber et al., 2020). Because the D614G mutation  
81 increases viral infectivity, fitness, and inter-individual transmissibility (Hou et al.,  
82 2020; Ozono et al., 2021; Plante et al., 2020; Volz et al., 2021; Yurkovetskiy et al.,  
83 2020; Zhou et al., 2021), the D614G-bearing variant has quickly swept out the  
84 original strain. Since the fall of 2020, some SARS-CoV-2 variants bearing multiple  
85 mutations have emerged and rapidly spread worldwide. As of June 2021, there have  
86 been at least five variants of concern (VOC): B.1.1.7 (alpha variant), B.1.351 (beta  
87 variant), P.1 (gamma variant), B.1.427/429 (epsilon variant; note that this variant has  
88 been downgraded to a variant of interest in May 2021) and B.1.617.2 (delta variant),  
89 and these lineages respectively emerged in the UK, South Africa, Brazil, the USA  
90 and India (CDC, 2021; WHO, 2021b).

91 As a common characteristic of VOCs, these variants tend to be relatively  
92 resistant to the neutralizing antibodies (NAbs) that were elicited in convalescent and  
93 vaccinated individuals [reviewed in (Corti et al., 2021; Harvey et al., 2021)]. In fact,  
94 recent investigations have revealed that B.1.1.7 (Chen et al., 2021; Collier et al.,  
95 2021; Wang et al., 2021b), B.1.351 (Chen et al., 2021; Garcia-Beltran et al., 2021;  
96 Hoffmann et al., 2021; Liu et al., 2021b; Planas et al., 2021; Wang et al., 2021b), P.1  
97 (Garcia-Beltran et al., 2021; Hoffmann et al., 2021; Wang et al., 2021a) and  
98 B.1.427/429 (Deng et al., 2021) are differentially resistant to the NAbs derived from  
99 COVID-19 convalescents and vaccinees. Because the receptor binding domain  
100 (RBD) of SARS-CoV-2 S protein is immunodominant, approximately 90% of the  
101 NAbs present in anti-SARS-CoV-2 sera targets this domain (Piccoli et al., 2020). On  
102 the other hand, some SARS-CoV-2 variants including VOCs have acquired mutation  
103 in the RBD, such as the E484K mutation (Garcia-Beltran et al., 2021; Hoffmann et  
104 al., 2021), to evade antiviral immunity.

105 At the end of 2020, the B.1.617 lineage has emerged in India, and this  
106 variant is thought to be a main driver of a massive COVID-19 surge in India, which

107 has peaked 400,000 infection cases per day ([Singh et al., 2021](#)). The B.1.617  
108 lineage includes three sublineages, B.1.617.1, B.1.617.2 and B.1.617.3, and a  
109 sublineage, B.1.617.2, is the latest VOC ([CDC, 2021](#); [WHO, 2021b](#)). Importantly,  
110 early evidence from the Public Health England has suggested that the B.1.617.2  
111 may have an increased risk of hospitalization compared to the B.1.1.7 cases ([PHE,](#)  
112 [2021](#)).

113         Compared to the other VOCs, there are at least two common features in  
114 the S protein of the B.1.617 lineage. One is the L452R mutation, which is shared  
115 with the B.1.427/429 lineage. Because recent studies including ours have shown  
116 that the L452R mutation increases viral infectivity and fusogenicity ([Deng et al.,](#)  
117 [2021](#); [Motozono et al., 2021](#)), the L452R mutation in the B.1.617 variant can  
118 contribute to the accelerated spread of this variant in the human population. The  
119 other is the substitution at the position 484 of S protein; the B.1.617.1 and B.1.617.3  
120 variants possess the E484Q mutation, while the two VOCs, B.1.351 and P.1,  
121 possess E484K ([CDC, 2021](#); [WHO, 2021b](#)). Intriguingly, both the E484K ([Baum et](#)  
122 [al., 2020](#); [Chen et al., 2021](#); [Liu et al., 2021c](#); [Wang et al., 2021b](#); [Weisblum et al.,](#)  
123 [2020](#)) and E484Q mutations ([Ferreira et al., 2021](#)) can contribute to the resistance  
124 to NAbs. In fact, recent studies have shown that the B.1.617.1 variant is resistant to  
125 the vaccine-induced NAbs ([Edara et al., 2021](#); [Liu et al., 2021a](#)). In contrast to these  
126 two sublineages, the B.1.617.2 lineage possesses a unique mutation, T478K. A  
127 study has recently shown that the B.1.617.2 variant is also relatively resistant to the  
128 NAbs elicited by vaccination ([Wall et al., 2021](#)).

129         Interestingly, the P681R mutation in the S protein of B.1.617 lineage is a  
130 unique and newly identified mutation in the VOCs so far. Because the P681R  
131 mutation is located in the proximity of the furin cleavage site (FCS; residues RRAR  
132 positioned between 682-5) of the SARS-CoV-2 S protein ([Shang et al., 2020](#)), it is  
133 possible that this substitution affects viral replication dynamics and potentially  
134 determine the virological characteristics of the B.1.617 variants. In fact, recent  
135 investigations have revealed that the deletion of FCS modulates viral replication  
136 kinetics in *in vitro* cell cultures and *in vivo* animal models ([Johnson et al., 2021](#);  
137 [Peacock et al., 2021](#)). However, it remains unclear which mutation(s) are responsible  
138 for the virological feature of this newly emerging VOC. In this study, we show that  
139 the P681R mutation enhances the cleavage of SARS-CoV-2 S protein. We further  
140 demonstrate that the P681R mutation enhances and accelerates viral fusion and  
141 promotes cell-cell infection.

## 142 **Results**

### 143 **Phylogenetic and epidemic dynamics of the B.1.617 lineage**

144 We set out to investigate the phylogenetic relationship of the three subvariants  
145 belonging to the B.1.617 lineage. We downloaded 1,761,037 SARS-CoV-2 genomes  
146 and information data from the Global Initiative on Sharing All Influenza Data  
147 (GISAID) database (<https://www.gisaid.org>; as of May 31, 2021). As expected, each  
148 of three sublineages, B.1.617.1, B.1.617.2 and B.1.617.3, formed a monophyletic  
149 cluster, respectively (**Figure 1A**). We then analyzed the epidemic of each of three  
150 B.1.617 sublineages. The B.1.617 variant, particularly B.1.617.1, was first detected  
151 in India on December 1, 2020 (GISAID ID: EPI\_ISL\_1372093) (**Figures 1B-1D**).  
152 Note that a SARS-CoV-2 variant (GISAID ID: EPI\_ISL\_2220643) isolated in Texas,  
153 the USA, on August 10, 2020, was also recorded to belong to the B.1.617.1.  
154 However, the S protein of this viral sequence (GISAID ID: EPI\_ISL\_2220643)  
155 possesses neither L452R nor P681R mutations, both of which are the features of  
156 the B.1.617 lineage. Therefore, the EPI\_ISL\_2220643 sequence isolated in the USA  
157 may not be the ancestor of the current B.1.617.1 lineage, and the EPI\_ISL\_1372093  
158 sequence obtained in India would be the oldest B.1.617 lineage.

159 The B.1.617.2 (GISAID ID: EPI\_ISL\_2131509) and B.1.617.3 (GISAID IDs:  
160 EPI\_ISL\_1703672, EPI\_ISL\_1703659, EPI\_ISL\_1704392) were detected in India on  
161 December 10, 2020 and February 13, 2021, respectively (**Figures 1E and 1F**). The  
162 B.1.617.1 sublineage has peaked during February to April, 2021, in India, and then  
163 decreased (**Figure 1D**). Although the B.1.617.3 variant has sporadically detected in  
164 India (**Figure 1F**), the B.1.617.2 lineage has become dominant in India since March  
165 2021 and spread all over the world (**Figure 1E**). At the end of May 2021, 100%, 70%  
166 and 43.3% of the deposited sequences in GISAID per day from India (May 7), the  
167 UK (May 21) and the whole world (May 19) have been occupied by the B.1.617.2  
168 sublineage (**Figure 1E and Table S1**).

169 We next investigated the proportion of amino acid replacements in the S  
170 protein of each B.1.617 sublineage comparing with the reference strain (Wuhan-Hu-  
171 1; GenBank accession no. NC\_045512.2). As shown in **Figure 1G**, the L452R and  
172 P681R mutations were highly conserved in the B.1.617 lineage, and notably, the  
173 P681R mutation (16,650/16,759 sequences, 99.3%) was the most representative  
174 mutation in this lineage. These data suggest that that the P681R mutation is a  
175 hallmark of the B.1.617 lineage.

176

### 177 **Prominent syncytia formation by the B.1.617 variants**

178 To investigate the virological characteristics of the B.1.617 variants, we conducted  
179 virological experiments using two viral isolates of B.1.617.1 (GISAID ID:



180 EPI\_ISL\_2378733) and B.1.617.2 (GISAID ID: EPI\_ISL\_2378732) as well as a  
181 D614G-bearing B.1.1 isolate (GISAID ID: EPI\_ISL\_479681) in Japan. In Vero cells,  
182 the growth of the B.1.617.1 and B.1.617.2 variants was significantly lower than that  
183 of the B.1.1 isolate (**Figure 2A**). Particularly, the levels of viral RNA of the B.1.617  
184 variants at 48 hours postinfection (hpi) were more than 150-fold lower than that of  
185 the B.1.1 isolate (**Figure 2A**). On the other hand, although the growth kinetics of  
186 these three viruses was relatively comparable in VeroE6/TMPRSS2 cells (**Figure**  
187 **2A**), microscopic observations showed that the VeroE6/TMPRSS2 cultures infected  
188 with these three viruses form syncytia. Notably, the two B.1.617 viruses formed  
189 larger syncytia compared to the B.1.1 virus (**Figure 2B**). By measuring the size of  
190 the floating syncytia in the infected VeroE6/TMPRSS2 culture, the syncytia formed  
191 by the B.1.617.1 and B.1.617.2 infection were significantly (2.3-fold and 2.7-fold)  
192 larger than that by the B.1.1 infection (**Figure 2B**). Immunofluorescence assay  
193 further showed that the two B.1.617 viruses form larger syncytia in  
194 VeroE6/TMPRSS2 cells compared to the B.1.1 isolate (**Figure 2C**). Altogether,  
195 these results suggest that the B.1.617 lineages are feasible for forming syncytia and  
196 relatively prefer cell-cell infection compared to the D614G-bearing B.1.1 virus.

197

### 198 **P681R mutation as the determinant of the promotion and acceleration of S-** 199 **mediated fusion**

200 As shown in **Figure 1G**, the P681R mutation is a unique feature of the B.1.617  
201 lineage. Because this mutation is located at the proximity of the FCS of SARS-CoV-  
202 2 S protein ([Shang et al., 2020](#)), we hypothesized that the P681R mutation is  
203 responsible for the preference of cell-cell fusion, which leads to larger syncytia  
204 formation, by the B.1.617 lineage. To address this possibility, we generated the  
205 P681R-bearing artificial virus by reverse genetics (**Figure 3A**) and performed  
206 virological experiments. As shown in **Figure 3B**, the growth kinetics of the  
207 D614G/P681R mutant was significantly lower than that of the D614G mutant in Vero  
208 and VeroE6/TMPRSS2 cells. Although the viral RNA level at 72 hpi in  
209 VeroE6/TMPRSS2 cells was comparable between these two viruses (**Figure 3B**),  
210 the size of floating syncytia in the D614G/P681R mutant-infected culture was  
211 significantly larger than that in the D614G mutant-infected culture (**Figure 3C**). This  
212 observation well corresponds to that in the culture infected with the B.1.617 variants  
213 (**Figure 2B**). Moreover, although the viral RNA levels of these two viruses were  
214 comparable in HeLa-ACE2/TMPRSS2 cells (**Figure 3B**), prominent and large  
215 syncytia were observed only in the culture infected with the D614G/P681R mutant  
216 (**Figure 3C**). These results suggest that the feature of the B.1.617 viruses observed

217 in *in vitro* cell culture experiments, particularly forming larger syncytia (**Figure 2**), is  
218 well reproduced by the P681R mutation.

219 To directly investigate the effect of P681R mutation on the cleavage of  
220 SARS-CoV-2 S protein, we prepared the HIV-1-based pseudoviruses carrying the  
221 P681R mutation. Western blotting of the pseudoviruses prepared showed that the  
222 level of cleaved S2 subunit was significantly increased by the P681R mutation  
223 (**Figure 4A**), suggesting that the P681R mutation facilitates the furin-mediated  
224 cleavage of SARS-CoV-2 S protein. We then performed the single-round  
225 pseudovirus infection assay using the target HOS cells with or without TMPRSS2  
226 expression. In the absence of TMPRSS2, the infectivity of the P681R/D614G-  
227 bearing pseudovirus was comparable to that of the D614G pseudovirus (**Figure 4B**,  
228 **left**). In the presence of TMPRSS2, the infectivity of the D614G pseudovirus  
229 increased at 5.0-6.3-fold compared to the TMPRSS2-null target cells (**Figure 4B**,  
230 **right**). Although the infectivity of the D614G/P681R pseudovirus also was increased  
231 by TMPRSS2 expression, it was significantly lower than the infectivity of the D614G  
232 pseudovirus (**Figure 4B, right**). These data suggest that the P681R mutation  
233 attenuates the infectivity of cell-free virus in the presence of TMPRSS2.

234 We next addressed the effect of P681R mutation on viral fusogenicity by  
235 cell-based fusion assay. In the effector cells (i.e., S-expressing cells), although the  
236 protein expression level of the D614G/P681R S was comparable to that of the  
237 D614G S, the level of the cleaved S2 subunit of the D614G/P681R mutant was  
238 significantly higher than that of the D614G S (**Figure 4C**). Consistent with the results  
239 in the pseudovirus assay (**Figure 4A**), these results suggest that P681R mutation  
240 facilitates the furin-mediated S cleavage. Flow cytometry showed that the surface  
241 expression level of the D614G/P681R S was significantly lower than the D614G S  
242 (**Figure 4D**). Nevertheless, the cell-based fusion assay using the target cells without  
243 TMPRSS2 demonstrated that the D614G/P681R S is 2.1-fold more fusogenic than  
244 the D614G S with a statistical significance ( $P = 0.0002$  by Welch's t test) (**Figure 4E**).  
245 Moreover, a mathematical modeling analysis of the fusion assay data showed that  
246 the initial fusion velocity of the D614G/P681R S ( $0.83 \pm 0.03$  per hour) is significantly  
247 (2.8-fold) faster than that the D614G S ( $0.30 \pm 0.03$  per hour;  $P = 4.0 \times 10^{-6}$  by  
248 Welch's t test) (**Figures 4F and 4G**). These data suggest that the P681R mutation  
249 enhances and accelerates the SARS-CoV-2 S-mediated fusion. Furthermore, when  
250 we use the target cells with TMPRSS2 expression, both the fusion efficacy (~1.2-  
251 fold) and initial fusion velocity (~2.0-fold) were increased in both the D614G and  
252 D614G/P681R S proteins (**Figures 4F and 4G**). These results suggest that  
253 TMPRSS2 facilitates the fusion mediated by SARS-CoV-2 S and human ACE2,



254 while the TMPRSS2-dependent acceleration and promotion of viral fusion is not  
255 specific for the P681R mutant.

256

### 257 **Resistance to NAb-mediated antiviral immunity by the P681R mutation**

258 The resistance to the NAb in the sera of COVID-19 convalescents and vaccinated  
259 individuals is a hallmark characteristic of the VOCs [reviewed in (Corti et al., 2021;  
260 Harvey et al., 2021)], and Liu et al. and Wall et al. recently showed that the B.1.617.1  
261 (Liu et al., 2021a) and B.1.617.2 (Wall et al., 2021) variants are relatively resistant  
262 to the NABs elicited by the BNT162b2 vaccination. To ask whether the P681R  
263 mutation contributes to this virological phenotype, we performed the neutralizing  
264 assay. As shown in **Figure 5A**, the D614G/P681R pseudovirus was partially (1.2-  
265 1.5-fold) resistant to the three monoclonal antibodies targeting the RBD of SARS-  
266 CoV-2 S protein. Additionally, the neutralizing experiments using the 19 sera of  
267 second BNT162b2 vaccination showed that the D614G/P681R pseudovirus is  
268 significantly resistant to the vaccine-induced NABs compared to the D614G  
269 pseudovirus ( $P < 0.0001$  by Wilcoxon matched-pairs signed rank test; **Figure 5B**  
270 **and Figure S2**). These results suggest that the P681R-bearing pseudovirus is  
271 relatively resistant to NABs. In contrast to the neutralizing activity against cell-free  
272 viruses, the SARS-CoV-2 S-based fusion assay showed that cell-cell infection is  
273 strongly resistant to the NABs and the insensitivity to the NABs on cell-cell infection  
274 is not dependent on the P681R mutation (**Figure 5C**). Altogether, these findings  
275 suggest that the P681R mutation confers the NABs resistance upon cell-free viral  
276 particles and cell-cell infection is resistant to the NAb-mediated antiviral action  
277 compared to cell-free infection.

## 278 Discussion

279 It is evident that most VOCs considered so far have acquired mutations in their S  
280 proteins, particularly in the RBD and N-terminal domain, to evade NAb (Corti et al.,  
281 2021; Harvey et al., 2021; Piccoli et al., 2020). In sharp contrast, here we  
282 demonstrated that the B.1.617 lineage has acquired a unique strategy to facilitate  
283 infection and evade antiviral immunity. The P681R mutation that is highly conserved  
284 in this lineage enhances the efficacy to viral fusion and further accelerates its speed  
285 of action. The P681R-mediated rapid kinetics of viral fusion may attribute to not only  
286 immune evasion but also possibly feasible the infection to exposed individuals.

287 Consistent with previous reports (Kruglova et al., 2021; Xia et al., 2020),  
288 here we showed that the cell-cell infection mediated by the SARS-CoV-2 S protein  
289 is resistant to NAb. The effect of NAb against cell-cell infection has been well  
290 studied in HIV-1 (*Retroviridae*) infection, and it is well known that cell-cell infection  
291 is relatively more resistant to NAb compared to cell-free infection [reviewed in  
292 (Agosto et al., 2015; Dufloo et al., 2018; Sattentau, 2008)]. The resistance of cell-  
293 cell spread against NAb is not limited to HIV-1 but has been observed in the other  
294 viruses such as vaccinia virus (*Poxviridae*) (Law et al., 2002) and hepatitis C virus  
295 (*Flaviviridae*) (Timpe et al., 2008), suggesting that cell-cell infection is a common  
296 strategy for a variety of viruses to evade antiviral humoral immunity. The fact that the  
297 B.1.617 variants as well as the P681R mutant efficiently form syncytia and the S  
298 P681R mutant accelerates and promotes cell-cell fusion suggests that switching the  
299 preference of viral replication mode from cell-free infection to cell-cell infection may  
300 be a unique strategy of the B.1.617 variants to evade antiviral immunity.

301 Previous studies have demonstrated the close association of the FCS in  
302 the SARS-CoV-2 S protein with viral replication mode and it is dependent on  
303 TMPRSS2. Johnson et al. and Peacock et al. showed that the loss of FCS results in  
304 the increase of viral replication efficacy in Vero cells while the attenuation of viral  
305 growth in the Vero cells expressing TMPRSS2 (Johnson et al., 2021; Peacock et al.,  
306 2021). On the contrary, here we showed that the replication efficacy of the B.1.617  
307 variants was severely decreased in Vero cells compared to VeroE6/TMPRSS2 cells.  
308 Together with previous findings, our data suggest that the furin-mediated cleavage  
309 of the SARS-CoV-2 S protein closely associates with the usage of TMPRSS2. On  
310 the other hand, both the FCS-deficient (Johnson et al., 2021) and the P681R-  
311 mutated pseudoviruses were resistant to the NAb-mediated antiviral effect. These  
312 data suggest that the resistance of the viruses harboring mutations around FCS is  
313 not dependent on the usage of TMPRSS2 and the tropism of cell-cell infection.

314 Although the P681R mutation is not located in the RBD of SARS-CoV-2 S  
315 protein, the P681R-harboring pseudovirus rendered resistance to the NAb targeting

316 RBD. Regarding this, the similarity of the evolutionary trajectory of HIV-1 envelope  
317 (Env) protein and SARS-CoV-2 S protein has been discussed [reviewed in (Fischer  
318 et al., 2021)]. In the case of HIV-1 Env, a type of well studied anti-HIV-1 NAb (e.g.,  
319 2G12, PGT121 and KD-247) targets the variable 3 (V3) region of Env [reviewed in  
320 (Sok and Burton, 2018)]. The Env V3 region is conformationally masked before the  
321 binding to viral receptor CD4 and is exposed after receptor binding to proceed viral  
322 entry step and determine the tropism of the usage of viral coreceptors [reviewed in  
323 (Arrildt et al., 2012)], suggesting that the V3 region is immunodominant and masking  
324 the immunodominant epitopes is a strategy for viruses to evade antiviral immunity.  
325 In fact, an artificially mutated HIV-1 Env that stably exposes the V3 region can be  
326 highly sensitive to the NAb targeting the V3 region (Hoffman et al., 1999). To  
327 overcome the V3-targeting neutralization, HIV-1 Env usually acquires mutations not  
328 in the V3 region but in the regions next to the V3 and conformationally masks the  
329 epitope in the V3 region (Hatada et al., 2010; Pinter et al., 2005; Pinter et al., 2004;  
330 Shibata et al., 2007). Although most NAb against SARS-CoV-2 target the RBD of  
331 S protein (Piccoli et al., 2020), viruses, mainly VOCs, have acquired mutations in  
332 this domain (e.g., E484K) to evade neutralization (Baum et al., 2020; Chen et al.,  
333 2021; Liu et al., 2021c; Wang et al., 2021b; Weisblum et al., 2020). On the other  
334 hand, the P681R mutation is not located in the RBD. Considering the examples of  
335 HIV-1 Env studies, the P681R mutation may conformationally mask the  
336 immunodominant epitopes located in the RBD to ablate the accessibility of NAb to  
337 this domain. Moreover, although the pseudovirus infectivity bearing the P681R  
338 mutation was ~2-fold attenuated when the TMPRSS2-expressing cells were used as  
339 the target cells, the P681R-bearing pseudovirus exhibited resistance to NAb.  
340 Therefore, the acquisition of this mutation may be due to a trade-off between viral  
341 infectivity and immune evasion.

342 In summary, here we demonstrated that the P681R mutation, a hallmark of  
343 the B.1.617 lineage, enhances viral fusion and promotes cell-cell infection. Although  
344 the P681R mutant is highly fusogenic, the virus harboring the P681R mutation did  
345 not necessarily show higher growth compared to the parental virus. Regarding this,  
346 the HIV-1 variants with higher fusogenicity have been isolated from AIDS patients,  
347 but the enhanced fusogenicity does not promote viral replication in *in vitro* cell  
348 cultures (Sterjovski et al., 2007). Similarly, the measles virus (*Paramyxoviridae*)  
349 harboring the deficient mutation in viral matrix protein (Cathomen et al., 1998) and  
350 substitution mutations in viral fusion protein (Ikegame et al., 2021; Watanabe et al.,  
351 2013) are highly fusogenic and efficiently expands via cell-cell fusion. However, the  
352 growth kinetics of the mutated measles virus with higher fusogenicity in *in vitro* cell  
353 cultures is less efficient than the parental virus (Cathomen et al., 1998). Therefore,

354 the discrepancy between the efficacy of viral growth in *in vitro* cell cultures and viral  
355 fusogenicity is not specific for SARS-CoV-2. Rather, the higher fusogenicity is  
356 associated with the severity of viral pathogenicity such as HIV-1 encephalitis (Rossi  
357 et al., 2008) and fatal subacute sclerosing panencephalitis, which is caused by  
358 measles virus infection in brain (Ikegame et al., 2021; Watanabe et al., 2013).  
359 Although the association between the COVID-19 severity and/or unusual symptoms  
360 caused by SARS-CoV-2 infection and the P681R mutation remains unclear, an early  
361 report from the PRE suggests the B.1.617.2 variant, which bears the P681R  
362 mutation, may be more pathogenic than the B.1.1.7 lineage (PHE, 2021). Switching  
363 viral infection mode by the P681R mutation may relate to the severity and/or unusual  
364 outcome of viral infection, therefore, the epidemic of the SARS-CoV-2 variants  
365 harboring the P681R mutation should be surveyed in depth.

366 **STAR★METHODS**

367 ● KEY RESOURCES TABLE

368 ● RESOURCE AVAILABILITY

369 ○ Lead Contact

370 ○ Materials Availability

371 ○ Data and Code Availability

372 ● EXPERIMENTAL MODEL AND SUBJECT DETAILS

373 ○ Ethics Statement

374 ○ Collection of BNT162b2-Vaccinated Sera

375 ● METHOD DETAILS

376 ○ Viral Genomes

377 ○ Phylogenetic Analyses

378 ○ SARS-CoV-2 Preparation and Titration

379 ○ SARS-CoV-2 Infection

380 ○ Immunofluorescence Staining

381 ○ SARS-CoV-2 Reverse Genetics

382 ○ Real-Time RT-PCR

383 ○ Plasmid Construction

384 ○ Pseudovirus Assay

385 ○ Western blotting

386 ○ SARS-CoV-2 S-Based Fusion Assay

387 ○ Mathematical Modeling for Fusion Velocity Quantification

388 ○ Neutralization Assay

389 ● QUANTIFICATION AND STATISTICAL ANALYSIS

390

391 **Supplemental Information**

392 Supplemental Information includes 2 figures and 4 tables and can be found with this

393 article online at <http://...>

394 **Author Contributions**

395 A.S., H.N., K.U., Y.Kosugi, T.Irie, E.P.B., Y.L.T., R.S., K.Shimizu, T.F., R.K., T.Ikeda  
396 and K.Sato. performed the experiments.

397 K.Sadamasu, K.T., T.S., I.Y., H.A., M.N., and K.Y. prepared experimental materials.  
398 J.W. and S.N. performed molecular phylogenetic analysis.

399 K.Shirakawa, Y.Kazuma, R.N., Y.H., and A.T.-K. collected clinical samples.

400 A.S., T.Irie, T.F., S.N., T.Ikeda and K.S. designed the experiments and interpreted  
401 the results.

402 K.S. wrote the original manuscript.

403 All authors reviewed and proofread the manuscript.

404 The Genotype to Phenotype Japan (G2P-Japan) Consortium contributed to the  
405 project administration.

406

407 **Consortia**

408 The Genotype to Phenotype Japan (G2P-Japan) Consortium: Mika Chiba, Hirotake  
409 Furihata, Haruyo Hasebe, Kazuko Kitazato, Haruko Kubo, Naoko Misawa, Nanami  
410 Morizako, Akiko Oide, Mai Suganami, Miyoko Takahashi, Kana Tsushima,  
411 Miyabishara Yokoyama, Yue Yuan

412

413 **Acknowledgments**

414 We would like to thank all members belonging to The Genotype to Phenotype Japan  
415 (G2P-Japan) Consortium. We thank Dr. Jin Gohda (The University of Tokyo, Japan)  
416 for providing reagents. An anti-HIV-1 p24 Monoclonal antibody (clone 183-H12-5C,  
417 Cat# ARP-3537) was obtained through the NIH HIV Reagent Program, NIAID, NIH  
418 (contributed by Drs. Bruce Chesebro and Kathy Wehrly). The super-computing  
419 resource was provided by Human Genome Center at The University of Tokyo and  
420 the NIG supercomputer at ROIS National Institute of Genetics.

421 This study was supported in part by AMED Research Program on Emerging  
422 and Re-emerging Infectious Diseases 20fk0108163 (to A.S.), 20fk0108401 (to T.F.),  
423 21fk0108617 (to T.F.), 20fk0108146 (to K.Sato), 20fk0108270 (to K.Sato) and  
424 20fk0108413 (to T.Ikeda, S.N. and K.Sato); AMED Research Program on HIV/AIDS  
425 21fk0410033 (to A.S.) and 21fk0410039 (to K.Sato); AMED Japan Program for  
426 Infectious Diseases Research and Infrastructure 20wm0325009 and 21wm0325009  
427 (to A.S.); JST A-STEP JPMJTM20SL (to T.Ikeda); JST SICORP (e-ASIA)  
428 JPMJSC20U1 (to K.Sato); JST SICORP JPMJSC21U5 (to K.Sato), JST CREST  
429 JPMJCR20H6 (to S.N.) and JPMJCR20H4 (to K.Sato); JSPS KAKENHI Grant-in-  
430 Aid for Scientific Research C 19K06382 (to A.S.), 18K07156 (to K.T.) and 21K07060  
431 (to K.T.), Scientific Research B 18H02662 (to K.Sato) and 21H02737 (to K.Sato);



432 JSPS Fund for the Promotion of Joint International Research (Fostering Joint  
433 International Research) 18KK0447 (to K.Sato); JSPS Core-to-Core Program  
434 JPJSCCA20190008 (A. Advanced Research Networks) (to K.Sato); JSPS Research  
435 Fellow DC1 19J20488 (to I.K.); JSPS Leading Initiative for Excellent Young  
436 Researchers (LEADER) (to T.Ikeda); ONO Medical Research Foundation (to  
437 K.Sato); Ichiro Kanehara Foundation (to K.Sato); Lotte Foundation (to K.Sato);  
438 Mochida Memorial Foundation for Medical and Pharmaceutical Research (to  
439 K.Sato); Daiichi Sankyo Foundation of Life Science (to K.Sato); Sumitomo  
440 Foundation (to K.Sato); Uehara Foundation (to K.Sato); Takeda Science Foundation  
441 (to T.Ikeda and K.Sato); The Tokyo Biochemical Research Foundation (to K.Sato);  
442 Mitsubishi Foundation (to T.Ikeda); Shin-Nihon Foundation of Advanced Medical  
443 Research (to T.Ikeda); Tsuchiya Foundation (to T.Irie); a Grant for Joint Research  
444 Projects of the Research Institute for Microbial Diseases, Osaka University (to A.S.);  
445 an intramural grant from Kumamoto University COVID-19 Research Projects  
446 (AMABIE) (to T.Ikeda); Intercontinental Research and Educational Platform Aiming  
447 for Eradication of HIV/AIDS (to T.Ikeda); and Joint Usage/Research Center program  
448 of Institute for Frontier Life and Medical Sciences, Kyoto University (to K.Sato).

## 449 **References**

- 450 Agosto, L.M., Uchil, P.D., and Mothes, W. (2015). HIV cell-to-cell transmission:  
451 effects on pathogenesis and antiretroviral therapy. *Trends Microbiol* 23, 289-295.
- 452 Arrildt, K.T., Joseph, S.B., and Swanstrom, R. (2012). The HIV-1 env protein: a coat  
453 of many colors. *Curr HIV/AIDS Rep* 9, 52-63.
- 454 Baum, A., Fulton, B.O., Wloga, E., Copin, R., Pascal, K.E., Russo, V., Giordano, S.,  
455 Lanza, K., Negron, N., Ni, M., *et al.* (2020). Antibody cocktail to SARS-CoV-2 spike  
456 protein prevents rapid mutational escape seen with individual antibodies. *Science*  
457 369, 1014-1018.
- 458 Cathomen, T., Mrkic, B., Spehner, D., Drillien, R., Naef, R., Pavlovic, J., Aguzzi, A.,  
459 Billeter, M.A., and Cattaneo, R. (1998). A matrix-less measles virus is infectious and  
460 elicits extensive cell fusion: consequences for propagation in the brain. *EMBO J* 17,  
461 3899-3908.
- 462 CDC (2021). "SARS-CoV-2 variant classifications and definitions (updated June 10,  
463 2021)". <https://www.cdc.gov/coronavirus/2019-ncov/variants/variant-info.html>.
- 464 Chen, R.E., Zhang, X., Case, J.B., Winkler, E.S., Liu, Y., VanBlargan, L.A., Liu, J.,  
465 Errico, J.M., Xie, X., Suryadevara, N., *et al.* (2021). Resistance of SARS-CoV-2  
466 variants to neutralization by monoclonal and serum-derived polyclonal antibodies.  
467 *Nat Med* 27, 717-726.
- 468 Collier, D.A., De Marco, A., Ferreira, I., Meng, B., Datir, R., Walls, A.C., Kemp, S.S.,  
469 Bassi, J., Pinto, D., Fregni, C.S., *et al.* (2021). Sensitivity of SARS-CoV-2 B.1.1.7 to  
470 mRNA vaccine-elicited antibodies. *Nature* 593, 136-141.
- 471 Corti, D., Purcell, L.A., Snell, G., and Veesler, D. (2021). Tackling COVID-19 with  
472 neutralizing monoclonal antibodies. *Cell*.
- 473 Deng, X., Garcia-Knight, M.A., Khalid, M.M., Servellita, V., Wang, C., Morris, M.K.,  
474 Sotomayor-González, A., Glasner, D.R., Reyes, K.R., Gliwa, A.S., *et al.* (2021).  
475 Transmission, infectivity, and antibody neutralization of an emerging SARS-CoV-2  
476 variant in California carrying a L452R spike protein mutation. *Cell in press*.
- 477 Dufloo, J., Bruel, T., and Schwartz, O. (2018). HIV-1 cell-to-cell transmission and  
478 broadly neutralizing antibodies. *Retrovirology* 15, 51.
- 479 Edara, V.-V., Lai, L., Sahoo, M.K., Floyd, K., Sibai, M., Solis, D., Flowers, M.W.,  
480 Hussaini, L., Ciric, C.R., Bechnack, S., *et al.* (2021). Infection and vaccine-induced  
481 neutralizing antibody responses to the SARS-CoV-2 B.1.617.1 variant. *BioRxiv*,  
482 443299.
- 483 Ferreira, I., Datir, R., Kemp, S., Papa, G., Rakshit, P., Singh, S., Meng, B., Pandey,  
484 R., Ponnusamy, K., Radhakrishnan, V.S., *et al.* (2021). SARS-CoV-2 B.1.617  
485 emergence and sensitivity to vaccine-elicited antibodies. *BioRxiv*, 443253.
- 486 Fischer, W., Giorgi, E.E., Chakraborty, S., Nguyen, K., Bhattarcharya, T., Theiler, J.,

487 Goloboff, P.A., Yoon, H., Abfalterer, W., Foley, B.T., *et al.* (2021). HIV-1 and SARS-  
488 CoV-2: patterns in the evolution of two pandemic pathogens. *Cell Host Microbe pre-*  
489 *proof*.

490 Garcia-Beltran, W.F., Lam, E.C., St Denis, K., Nitido, A.D., Garcia, Z.H., Hauser,  
491 B.M., Feldman, J., Pavlovic, M.N., Gregory, D.J., Poznansky, M.C., *et al.* (2021).  
492 Multiple SARS-CoV-2 variants escape neutralization by vaccine-induced humoral  
493 immunity. *Cell* 184, 2372-2383 e2379.

494 Harvey, W.T., Carabelli, A.M., Jackson, B., Gupta, R.K., Thomson, E.C., Harrison,  
495 E.M., Ludden, C., Reeve, R., Rambaut, A., Consortium, C.-G.U., *et al.* (2021).  
496 SARS-CoV-2 variants, spike mutations and immune escape. *Nat Rev Microbiol*.

497 Hatada, M., Yoshimura, K., Harada, S., Kawanami, Y., Shibata, J., and Matsushita,  
498 S. (2010). Human immunodeficiency virus type 1 evasion of a neutralizing anti-V3  
499 antibody involves acquisition of a potential glycosylation site in V2. *J Gen Virol* 91,  
500 1335-1345.

501 Hoffman, T.L., LaBranche, C.C., Zhang, W., Canziani, G., Robinson, J., Chaiken, I.,  
502 Hoxie, J.A., and Doms, R.W. (1999). Stable exposure of the coreceptor-binding site  
503 in a CD4-independent HIV-1 envelope protein. *Proc Natl Acad Sci U S A* 96, 6359-  
504 6364.

505 Hoffmann, M., Arora, P., Gross, R., Seidel, A., Hornich, B.F., Hahn, A.S., Kruger, N.,  
506 Graichen, L., Hofmann-Winkler, H., Kempf, A., *et al.* (2021). SARS-CoV-2 variants  
507 B.1.351 and P.1 escape from neutralizing antibodies. *Cell* 184, 2384-2393 e2312.

508 Hou, Y.J., Chiba, S., Halfmann, P., Ehre, C., Kuroda, M., Dinnon, K.H., 3rd, Leist,  
509 S.R., Schafer, A., Nakajima, N., Takahashi, K., *et al.* (2020). SARS-CoV-2 D614G  
510 variant exhibits efficient replication *ex vivo* and transmission *in vivo*. *Science* 370,  
511 1464-1468.

512 Ikeda, T., Molan, A.M., Jarvis, M.C., Carpenter, M.A., Salamango, D.J., Brown, W.L.,  
513 and Harris, R.S. (2019). HIV-1 restriction by endogenous APOBEC3G in the myeloid  
514 cell line THP-1. *J Gen Virol* 100, 1140-1152.

515 Ikeda, T., Symeonides, M., Albin, J.S., Li, M., Thali, M., and Harris, R.S. (2018). HIV-  
516 1 adaptation studies reveal a novel Env-mediated homeostasis mechanism for  
517 evading lethal hypermutation by APOBEC3G. *PLoS Pathog* 14, e1007010.

518 Ikegame, S., Hashiguchi, T., Hung, C.T., Dobrindt, K., Brennand, K.J., Takeda, M.,  
519 and Lee, B. (2021). Fitness selection of hyperfusogenic measles virus F proteins  
520 associated with neuropathogenic phenotypes. *Proc Natl Acad Sci U S A* 118.

521 Johnson, B.A., Xie, X., Bailey, A.L., Kalveram, B., Lokugamage, K.G., Muruato, A.,  
522 Zou, J., Zhang, X., Juelich, T., Smith, J.K., *et al.* (2021). Loss of furin cleavage site  
523 attenuates SARS-CoV-2 pathogenesis. *Nature* 591, 293-299.

524 Katoh, K., and Standley, D.M. (2013). MAFFT multiple sequence alignment software

525 version 7: improvements in performance and usability. *Mol Biol Evol* 30, 772-780.  
526 Kawase, M., Shirato, K., van der Hoek, L., Taguchi, F., and Matsuyama, S. (2012).  
527 Simultaneous treatment of human bronchial epithelial cells with serine and cysteine  
528 protease inhibitors prevents severe acute respiratory syndrome coronavirus entry. *J*  
529 *Virol* 86, 6537-6545.

530 Kondo, N., Miyauchi, K., and Matsuda, Z. (2011). Monitoring viral-mediated  
531 membrane fusion using fluorescent reporter methods. *Curr Protoc Cell Biol Chapter*  
532 26, Unit 26 29.

533 Korber, B., Fischer, W.M., Gnanakaran, S., Yoon, H., Theiler, J., Abfalterer, W.,  
534 Hengartner, N., Giorgi, E.E., Bhattacharya, T., Foley, B., *et al.* (2020). Tracking  
535 changes in SARS-CoV-2 spike: evidence that D614G increases infectivity of the  
536 COVID-19 virus. *Cell* 182, 812-827.

537 Kruglova, N., Siniavin, A., Gushchin, V., and Mazurov, D. (2021). SARS-CoV-2 cell-  
538 to-cell infection is resistant to neutralizing antibodies. *BioRxiv*, 442701.

539 Law, M., Hollinshead, R., and Smith, G.L. (2002). Antibody-sensitive and antibody-  
540 resistant cell-to-cell spread by vaccinia virus: role of the A33R protein in antibody-  
541 resistant spread. *J Gen Virol* 83, 209-222.

542 Liu, J., Liu, Y., Xia, H., Zou, J., Weaver, S.C., Swanson, K.A., Cai, H., Cutler, M.,  
543 Cooper, D., Muik, A., *et al.* (2021a). BNT162b2-elicited neutralization of B.1.617 and  
544 other SARS-CoV-2 variants. *Nature accelerated*.

545 Liu, Y., Liu, J., Xia, H., Zhang, X., Fontes-Garfias, C.R., Swanson, K.A., Cai, H.,  
546 Sarkar, R., Chen, W., Cutler, M., *et al.* (2021b). Neutralizing activity of BNT162b2-  
547 elicited serum. *N Engl J Med* 384, 1466-1468.

548 Liu, Z., VanBlargan, L.A., Bloyet, L.M., Rothlauf, P.W., Chen, R.E., Stumpf, S., Zhao,  
549 H., Errico, J.M., Theel, E.S., Liebeskind, M.J., *et al.* (2021c). Identification of SARS-  
550 CoV-2 spike mutations that attenuate monoclonal and serum antibody neutralization.  
551 *Cell Host Microbe* 29, 477-488 e474.

552 Matsuyama, S., Nao, N., Shirato, K., Kawase, M., Saito, S., Takayama, I., Nagata,  
553 N., Sekizuka, T., Kato, H., Kato, F., *et al.* (2020). Enhanced isolation of SARS-CoV-  
554 2 by TMPRSS2-expressing cells. *Proc Natl Acad Sci U S A* 117, 7001-7003.

555 Minh, B.Q., Schmidt, H.A., Chernomor, O., Schrempf, D., Woodhams, M.D., von  
556 Haeseler, A., and Lanfear, R. (2020). IQ-TREE 2: New Models and Efficient Methods  
557 for Phylogenetic Inference in the Genomic Era. *Mol Biol Evol* 37, 1530-1534.

558 Motozono, C., Toyoda, M., Zahradnik, J., Ikeda, T., Saito, A., Tan, T.S., Ngare, I.,  
559 Nasser, H., Kimura, I., Uriu, K., *et al.* (2021). An emerging SARS-CoV-2 mutant  
560 evading cellular immunity and increasing viral infectivity. *BioRxiv*, 438288.

561 Niwa, H., Yamamura, K., and Miyazaki, J. (1991). Efficient selection for high-  
562 expression transfectants with a novel eukaryotic vector. *Gene* 108, 193-199.

563 Ozono, S., Zhang, Y., Ode, H., Sano, K., Tan, T.S., Imai, K., Miyoshi, K., Kishigami,  
564 S., Ueno, T., Iwatani, Y., *et al.* (2021). SARS-CoV-2 D614G spike mutation increases  
565 entry efficiency with enhanced ACE2-binding affinity. *Nat Commun* 12, 848.

566 Ozono, S., Zhang, Y., Tobiume, M., Kishigami, S., and Tokunaga, K. (2020). Super-  
567 rapid quantitation of the production of HIV-1 harboring a luminescent peptide tag. *J*  
568 *Biol Chem* 295, 13023-13030.

569 Peacock, T.P., Goldhill, D.H., Zhou, J., Baillon, L., Frise, R., Swann, O.C.,  
570 Kugathasan, R., Penn, R., Brown, J.C., Sanchez-David, R.Y., *et al.* (2021). The furin  
571 cleavage site in the SARS-CoV-2 spike protein is required for transmission in ferrets.  
572 *Nat Microbiol.*

573 PHE (2021). Public Health England. "3 June 2021 Risk assessment for SARS-CoV-  
574 2 variant: Delta (VOC-21APR-02, B.1.617.2)"  
575 [https://assets.publishing.service.gov.uk/government/uploads/system/uploads/attach](https://assets.publishing.service.gov.uk/government/uploads/system/uploads/attachment_data/file/991135/3_June_2021_Risk_assessment_for_SARS-CoV-2_variant_DELTA.pdf)  
576 [hment\\_data/file/991135/3\\_June\\_2021\\_Risk\\_assessment\\_for\\_SARS-CoV-](https://assets.publishing.service.gov.uk/government/uploads/system/uploads/attachment_data/file/991135/3_June_2021_Risk_assessment_for_SARS-CoV-2_variant_DELTA.pdf)  
577 [2\\_variant\\_DELTA.pdf](https://assets.publishing.service.gov.uk/government/uploads/system/uploads/attachment_data/file/991135/3_June_2021_Risk_assessment_for_SARS-CoV-2_variant_DELTA.pdf).

578 Piccoli, L., Park, Y.J., Tortorici, M.A., Czudnochowski, N., Walls, A.C., Beltramello,  
579 M., Silacci-Fregni, C., Pinto, D., Rosen, L.E., Bowen, J.E., *et al.* (2020). Mapping  
580 Neutralizing and Immunodominant Sites on the SARS-CoV-2 Spike Receptor-  
581 Binding Domain by Structure-Guided High-Resolution Serology. *Cell* 183, 1024-  
582 1042 e1021.

583 Pinter, A., Honnen, W.J., D'Agostino, P., Gorny, M.K., Zolla-Pazner, S., and Kayman,  
584 S.C. (2005). The C108g epitope in the V2 domain of gp120 functions as a potent  
585 neutralization target when introduced into envelope proteins derived from human  
586 immunodeficiency virus type 1 primary isolates. *J Virol* 79, 6909-6917.

587 Pinter, A., Honnen, W.J., He, Y., Gorny, M.K., Zolla-Pazner, S., and Kayman, S.C.  
588 (2004). The V1/V2 domain of gp120 is a global regulator of the sensitivity of primary  
589 human immunodeficiency virus type 1 isolates to neutralization by antibodies  
590 commonly induced upon infection. *J Virol* 78, 5205-5215.

591 Planas, D., Bruel, T., Grzelak, L., Guivel-Benhassine, F., Staropoli, I., Porrot, F.,  
592 Planchais, C., Buchrieser, J., Rajah, M.M., Bishop, E., *et al.* (2021). Sensitivity of  
593 infectious SARS-CoV-2 B.1.1.7 and B.1.351 variants to neutralizing antibodies. *Nat*  
594 *Med* 27, 917-924.

595 Plante, J.A., Liu, Y., Liu, J., Xia, H., Johnson, B.A., Lokugamage, K.G., Zhang, X.,  
596 Muruato, A.E., Zou, J., Fontes-Garfias, C.R., *et al.* (2020). Spike mutation D614G  
597 alters SARS-CoV-2 fitness. *Nature*.

598 Plante, J.A., Mitchell, B.M., Plante, K.S., Debbink, K., Weaver, S.C., and Menachery,  
599 V.D. (2021). The variant gambit: COVID's next move. *Cell Host Microbe* 29, 508-  
600 515.



- 601 Rausch, T., Fritz, M.H., Untergasser, A., and Benes, V. (2020). Tracy: basecalling,  
602 alignment, assembly and deconvolution of sanger chromatogram trace files. *BMC*  
603 *Genomics* 21, 230.
- 604 Reed, L.J., and Muench, H. (1938). A Simple Method of Estimating Fifty Percent  
605 Endpoints. *Am J Hygiene* 27, 493-497.
- 606 Rossi, F., Querido, B., Nimmagadda, M., Cocklin, S., Navas-Martin, S., and Martin-  
607 Garcia, J. (2008). The V1-V3 region of a brain-derived HIV-1 envelope glycoprotein  
608 determines macrophage tropism, low CD4 dependence, increased fusogenicity and  
609 altered sensitivity to entry inhibitors. *Retrovirology* 5, 89.
- 610 Sattentau, Q. (2008). Avoiding the void: cell-to-cell spread of human viruses. *Nat*  
611 *Rev Microbiol* 6, 815-826.
- 612 Shang, J., Wan, Y., Luo, C., Ye, G., Geng, Q., Auerbach, A., and Li, F. (2020). Cell  
613 entry mechanisms of SARS-CoV-2. *Proc Natl Acad Sci U S A* 117, 11727-11734.
- 614 Shema Mugisha, C., Vuong, H.R., Puray-Chavez, M., Bailey, A.L., Fox, J.M., Chen,  
615 R.E., Wessel, A.W., Scott, J.M., Harastani, H.H., Boon, A.C.M., *et al.* (2020). A  
616 simplified quantitative real-time PCR assay for monitoring SARS-CoV-2 growth in  
617 cell culture. *mSphere* 5.
- 618 Shibata, J., Yoshimura, K., Honda, A., Koito, A., Murakami, T., and Matsushita, S.  
619 (2007). Impact of V2 mutations on escape from a potent neutralizing anti-V3  
620 monoclonal antibody during in vitro selection of a primary human immunodeficiency  
621 virus type 1 isolate. *J Virol* 81, 3757-3768.
- 622 Singh, J., Rahman, S.A., Ehtesham, N.Z., Hira, S., and Hasnain, S.E. (2021). SARS-  
623 CoV-2 variants of concern are emerging in India. *Nat Med*.
- 624 Sok, D., and Burton, D.R. (2018). Recent progress in broadly neutralizing antibodies  
625 to HIV. *Nat Immunol* 19, 1179-1188.
- 626 Sterjovski, J., Churchill, M.J., Ellett, A., Gray, L.R., Roche, M.J., Dunfee, R.L., Purcell,  
627 D.F., Saksena, N., Wang, B., Sonza, S., *et al.* (2007). Asn 362 in gp120 contributes  
628 to enhanced fusogenicity by CCR5-restricted HIV-1 envelope glycoprotein variants  
629 from patients with AIDS. *Retrovirology* 4, 89.
- 630 Sultana, T., Mamede, J.I., Saito, A., Ode, H., Nohata, K., Cohen, R., Nakayama,  
631 E.E., Iwatani, Y., Yamashita, M., Hope, T.J., *et al.* (2019). Multiple Pathways To  
632 Avoid Beta Interferon Sensitivity of HIV-1 by Mutations in Capsid. *J Virol* 93.
- 633 Timpe, J.M., Stamatakis, Z., Jennings, A., Hu, K., Farquhar, M.J., Harris, H.J.,  
634 Schwarz, A., Desombere, I., Roels, G.L., Balfe, P., *et al.* (2008). Hepatitis C virus  
635 cell-cell transmission in hepatoma cells in the presence of neutralizing antibodies.  
636 *Hepatology* 47, 17-24.
- 637 Torii, S., Ono, C., Suzuki, R., Morioka, Y., Anzai, I., Fauzyah, Y., Maeda, Y., Kamitani,  
638 W., Fukuhara, T., and Matsuura, Y. (2021). Establishment of a reverse genetics



639 system for SARS-CoV-2 using circular polymerase extension reaction. *Cell Rep* 35,  
640 109014.

641 Volz, E., Hill, V., McCrone, J.T., Price, A., Jorgensen, D., O'Toole, A., Southgate, J.,  
642 Johnson, R., Jackson, B., Nascimento, F.F., *et al.* (2021). Evaluating the effects of  
643 SARS-CoV-2 spike mutation D614G on transmissibility and pathogenicity. *Cell* 184,  
644 64-75 e11.

645 Wall, E.C., Wu, M., Harvey, R., Kelly, G., Warchal, S., Sawyer, C., Daniels, R.,  
646 Hobson, P., Hatipoglu, E., Ngai, Y., *et al.* (2021). Neutralising antibody activity  
647 against SARS-CoV-2 VOCs B.1.617.2 and B.1.351 by BNT162b2 vaccination.  
648 *Lancet*.

649 Wang, P., Casner, R.G., Nair, M.S., Wang, M., Yu, J., Cerutti, G., Liu, L., Kwong,  
650 P.D., Huang, Y., Shapiro, L., *et al.* (2021a). Increased resistance of SARS-CoV-2  
651 variant P.1 to antibody neutralization. *Cell Host Microbe* 29, 747-751 e744.

652 Wang, P., Nair, M.S., Liu, L., Iketani, S., Luo, Y., Guo, Y., Wang, M., Yu, J., Zhang,  
653 B., Kwong, P.D., *et al.* (2021b). Antibody resistance of SARS-CoV-2 variants B.1.351  
654 and B.1.1.7. *Nature* 593, 130-135.

655 Watanabe, S., Shirogane, Y., Suzuki, S.O., Ikegame, S., Koga, R., and Yanagi, Y.  
656 (2013). Mutant fusion proteins with enhanced fusion activity promote measles virus  
657 spread in human neuronal cells and brains of suckling hamsters. *J Virol* 87, 2648-  
658 2659.

659 Weisblum, Y., Schmidt, F., Zhang, F., DaSilva, J., Poston, D., Lorenzi, J.C.,  
660 Muecksch, F., Rutkowska, M., Hoffmann, H.H., Michailidis, E., *et al.* (2020). Escape  
661 from neutralizing antibodies by SARS-CoV-2 spike protein variants. *Elife* 9.

662 WHO (2021a). "Coronavirus disease 2019".  
663 <https://www.who.int/emergencies/diseases/novel-coronavirus-2019>.

664 WHO (2021b). "Tracking SARS-CoV-2 variants".  
665 <https://www.who.int/en/activities/tracking-SARS-CoV-2-variants/>.

666 Wu, F., Zhao, S., Yu, B., Chen, Y.M., Wang, W., Song, Z.G., Hu, Y., Tao, Z.W., Tian,  
667 J.H., Pei, Y.Y., *et al.* (2020). A new coronavirus associated with human respiratory  
668 disease in China. *Nature* 579, 265-269.

669 Xia, S., Liu, M., Wang, C., Xu, W., Lan, Q., Feng, S., Qi, F., Bao, L., Du, L., Liu, S.,  
670 *et al.* (2020). Inhibition of SARS-CoV-2 (previously 2019-nCoV) infection by a highly  
671 potent pan-coronavirus fusion inhibitor targeting its spike protein that harbors a high  
672 capacity to mediate membrane fusion. *Cell Res* 30, 343-355.

673 Yurkovetskiy, L., Wang, X., Pascal, K.E., Tomkins-Tinch, C., Nyalile, T.P., Wang, Y.,  
674 Baum, A., Diehl, W.E., Dauphin, A., Carbone, C., *et al.* (2020). Structural and  
675 functional analysis of the D614G SARS-CoV-2 spike protein variant. *Cell* 183, 739-  
676 751 e738.

677 Zhou, B., Thi Nhu Thao, T., Hoffmann, D., Taddeo, A., Ebert, N., Labroussaa, F.,  
678 Pohlmann, A., King, J., Steiner, S., Kelly, J.N., *et al.* (2021). SARS-CoV-2 spike  
679 D614G change enhances replication and transmission. *Nature* 592, 122-127.  
680 Zhou, P., Yang, X.L., Wang, X.G., Hu, B., Zhang, L., Zhang, W., Si, H.R., Zhu, Y.,  
681 Li, B., Huang, C.L., *et al.* (2020). A pneumonia outbreak associated with a new  
682 coronavirus of probable bat origin. *Nature* 579, 270-273.  
683

684 **Figures**  
685

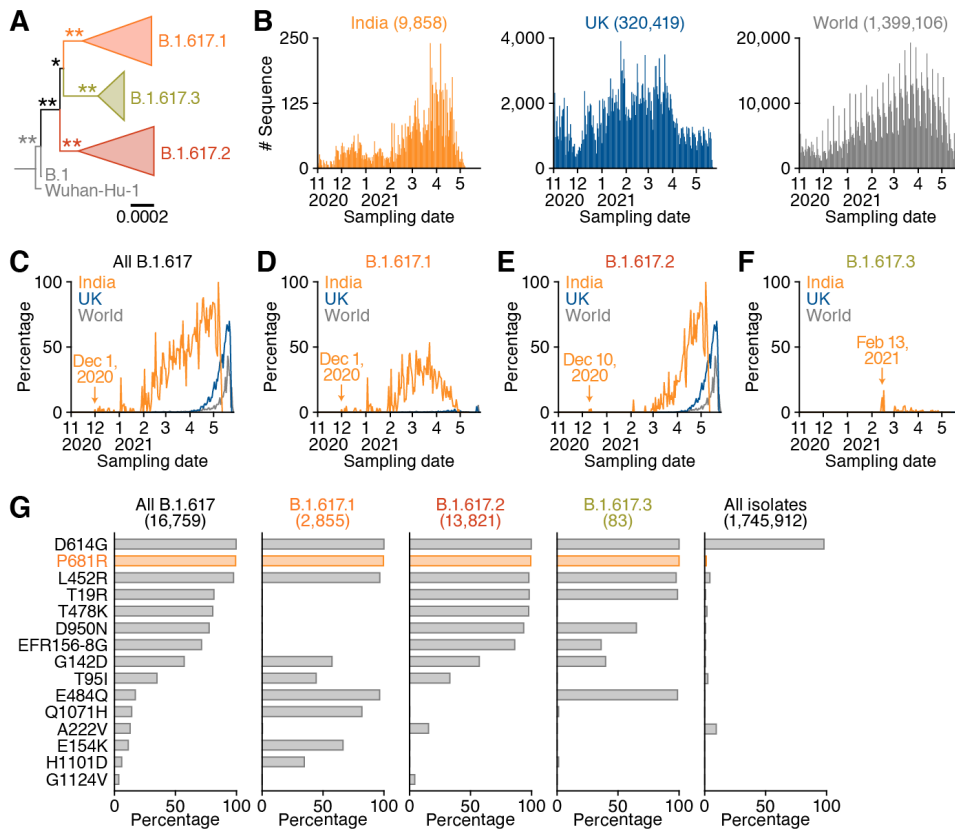

686

687 **Figure 1. Molecular phylogenetic and epidemic dynamics of the B.1.617**  
688 **lineage during the pandemic**

689 (A) A phylogenetic tree of the B.1.617 lineage. Bar, 0.0002 substitutions per site.  
690 Bootstrap values, \*\*, 100%; \*, >70%. The uncollapsed tree is shown in **Figure S1**.

691 (B-F) Epidemic dynamics of the B.1.617 lineage. (B) The numbers of sequences  
692 deposited in GISAID per day for India (orange, left), UK (blue, middle), and the whole  
693 world (gray, right). (C-F) The percentages of each lineage deposited per day (C, all  
694 B.1.617; D, B.1.617.1; E, B.1.617.2; F, B.1.617.3) from India (orange), the UK (blue)  
695 and the whole world (gray) are shown. The date first identified is indicated. The raw  
696 data are summarized in **Table S1**.

697 (G) Proportion of amino acid replacements in the B.1.617 lineage. The top 15  
698 replacements conserved in the S protein of the B.1.617 and its sublineages are  
699 summarized. The number in parenthesis indicates the number of sequences  
700 included in each panel. The raw data are summarized in **Table S2**.

701 See also **Figure S1** and **Tables S1** and **S2**.

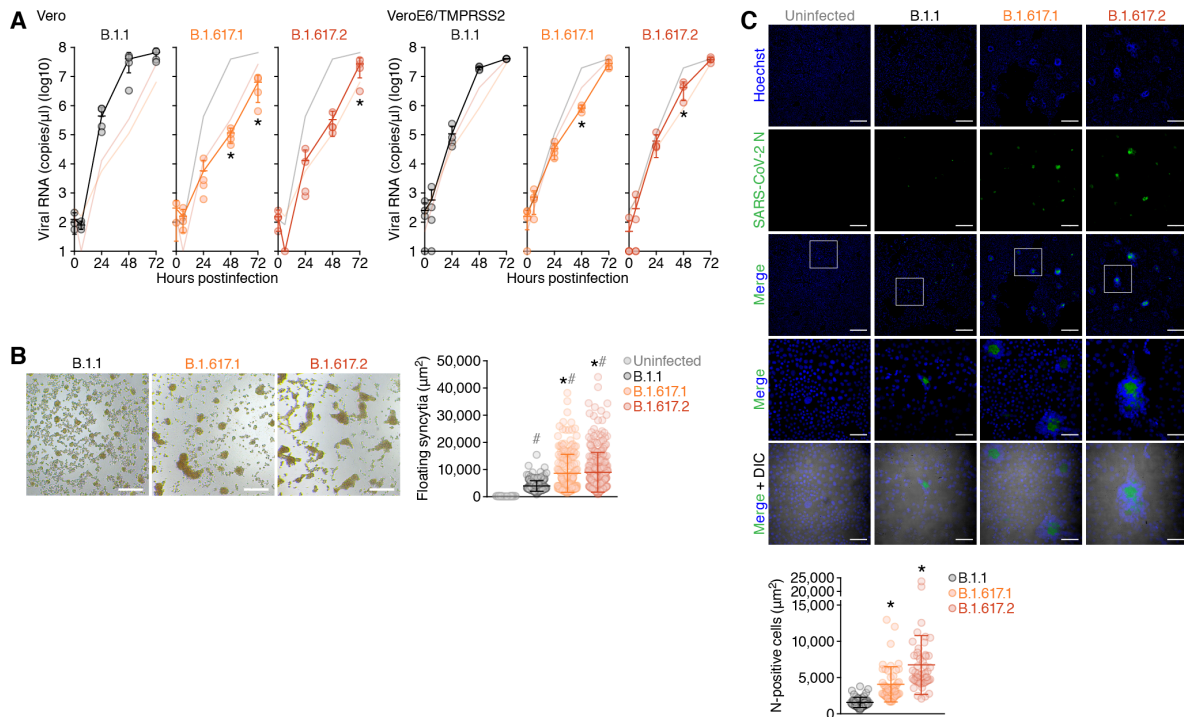

702

703

## Figure 2. Virological features of the B.1.617 lineage

704 (A) Growth kinetics of two B.1.617 variants and a B.1.1 isolate. Two viral isolates of  
 705 B.1.617.1 (GISAID ID: EPI\_ISL\_2378733) and B.1.617.2 (GISAID ID:  
 706 EPI\_ISL\_2378732) and a D614G-bearing B.1.1 isolate (GISAID ID:  
 707 EPI\_ISL\_479681) [100 50% tissue culture infectious dose (TCID<sub>50</sub>)] were inoculated  
 708 into Vero cells, VeroE6/TMPRSS2 cells and the copy number of viral RNA in the  
 709 culture supernatant was quantified by real-time RT-PCR. The growth curves of the  
 710 viruses inoculated are shown. Assays were performed in quadruplicate.

711 (B) Syncytia formation. The syncytia in infected VeroE6/TMPRSS2 cells were  
 712 observed at 72 hours postinfection (hpi). (Left) Representative bright-field images of  
 713 VeroE6/TMPRSS2 cells at 72 hpi are shown. Bars, 100 μm. (Right) The size of  
 714 floating syncytia in B.1.1-infected (n = 217), B.1.617.1-infected (n = 306) and  
 715 B.1.617.2-infected (n = 217) cultures are shown. The size of the floating single cells  
 716 in uninfected (n = 177) was also shown as a negative control.

717 (C) Immunofluorescence staining. VeroE6/TMPRSS2 cells infected with the viruses  
 718 indicated [multiplicity of infection (MOI) 0.01] were stained with anti-SARS-CoV-2  
 719 nucleocapsid (N) (green) and DAPI (blue). (Top) Representative images at 48 hpi  
 720 are shown. Areas enclosed with squares are enlarged in the bottom panels. DIC,  
 721 differential interference contrast. Bars, 200 μm for low magnification panels; 50 μm  
 722 for high magnification panels. (Bottom) The area of N-positive cells in B.1.1-infected  
 723 (n = 50), B.1.617.1-infected (n = 50) and B.1.617.2-infected (n = 50) cultures are  
 724 shown.

725 In **A**, statistically significant differences (\*,  $P < 0.05$ ) versus the B.1.1 isolate were  
726 determined by Student's  $t$  test.  
727 In **B and C**, statistically significant differences versus the B.1.1-infected culture (\*,  $P$   
728  $< 0.05$ ) and uninfected culture (#,  $P < 0.05$ ) were determined by the Mann-Whitney  
729 U test.

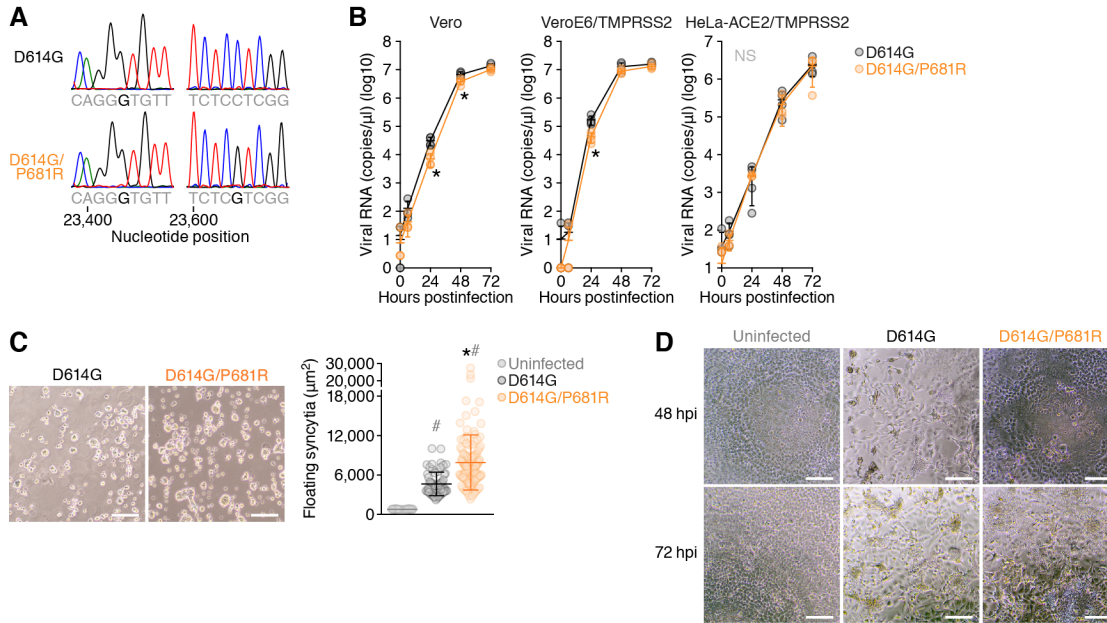

730

731 **Figure 3. Virological features of the P681R-harboring virus**

732 (A) Chromatograms of the mutated regions of SARS-CoV-2 viruses artificially  
 733 generated by reverse genetics. Chromatograms of nucleotide positions 23,399-  
 734 23,407 (left) and 23,600-23,609 (right) of parental SARS-CoV-2 (strain WK-521,  
 735 PANGO lineage A; GISAID ID: EPI\_ISL\_408667) and the D614G (A23403G in  
 736 nucleotide) and P681R (C23604G in nucleotide) mutation are shown.

737 (B) Growth kinetics of artificially generated viruses. The D614G and D614G/P681R  
 738 mutant viruses were generated by reverse genetics. These viruses (100 TCID<sub>50</sub>)  
 739 were inoculated into Vero cells, VeroE6/TMPRSS2 cells, and HeLa-  
 740 ACE2/TMPRSS2 cells and the copy number of viral RNA in the culture supernatant  
 741 was quantified by real-time RT-PCR. The growth curves of the viruses inoculated  
 742 are shown. Assays were performed in quadruplicate.

743 (C and D) Syncytia formation. The floating syncytia in infected VeroE6/TMPRSS2  
 744 cells at 72 hpi (C) and the adherent syncytia in infected HeLa-ACE2/TMPRSS2 at  
 745 48 hpi (D) are shown. In C, The size of floating syncytia in the D614G mutant-infected  
 746 (n = 63) and the D614G/P681R mutant-infected (n = 126) cultures are shown. The  
 747 size of the floating single cells in uninfected culture (n = 60) was also shown as a  
 748 negative control. Bars, 100 μm.

749 In B, statistically significant differences (\*,  $P < 0.05$ ) versus the D614G virus were  
 750 determined by Student's *t* test.

751 In C, statistically significant differences versus the D614G mutant-infected culture (\*,  
 752  $P < 0.05$ ) and uninfected culture (#,  $P < 0.05$ ) were determined by the Mann-Whitney  
 753 U test.



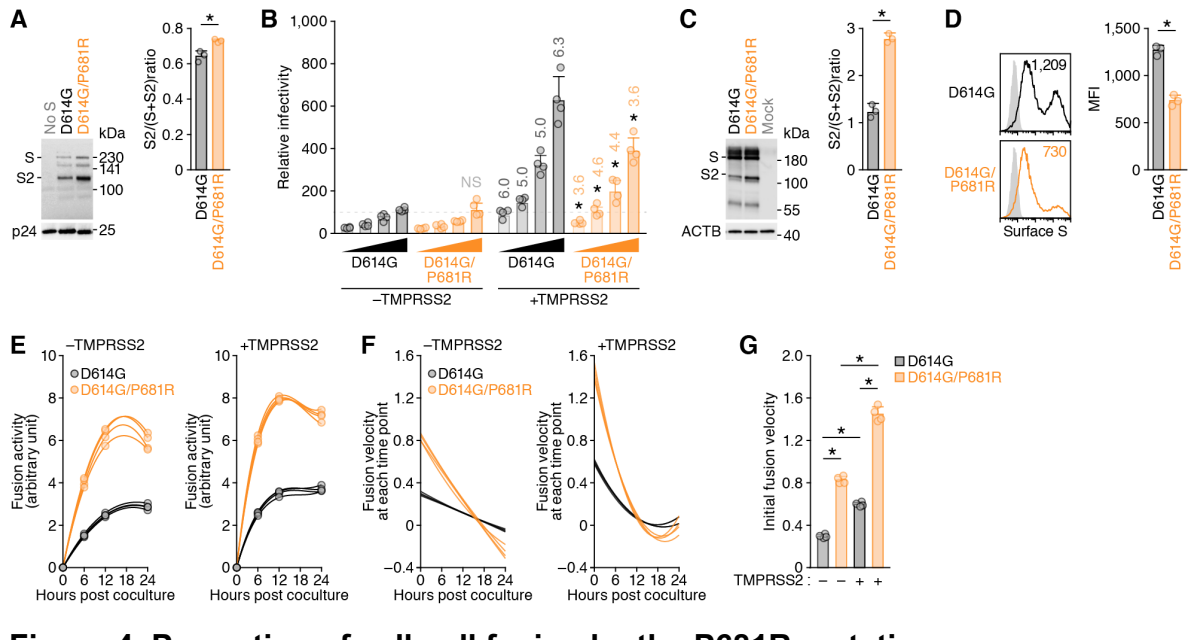

754

755 **Figure 4. Promotion of cell-cell fusion by the P681R mutation**

756 **(A)** Western blotting of pseudoviruses. (Left) Representative blots of SARS-CoV-2  
 757 full-length S and cleaved S2 proteins as well as HIV-1 p24 capsid as an internal  
 758 control. kDa, kilodalton. (Right) The ratio of S2 to the full-length S plus S2 proteins  
 759 on pseudovirus particles.

760 **(B)** Pseudovirus assay. The HIV-1-based reporter virus pseudotyped with the SARS-  
 761 CoV-2 S D614G or D614G/P681R was inoculated into HOS-ACE2 cells or HOS-  
 762 ACE2/TMPRSS2 cells at 4 different doses ( $2.5 \times 10^5$ ,  $5.0 \times 10^5$ ,  $1 \times 10^6$  and  $2 \times 10^6$   
 763 HiBiT values). Percentages of infectivity compared to the virus pseudotyped with  
 764 parental S D614G ( $2 \times 10^6$  HiBiT values) in HOS-ACE2 cells are shown. The  
 765 numbers on the bars of the HOS-ACE2/TMPRSS2 cell data indicate the fold change  
 766 versus the HOS-ACE2 cell data. Assays were performed in quadruplicate.

767 **(C)** Western blotting of the S-expressing cells. (Left) Representative blots of SARS-  
 768 CoV-2 full-length S and cleaved S2 proteins as well as ACTB as an internal control.  
 769 kDa, kilodalton. (Right) The ratio of S2 to the full-length S plus S2 proteins in the S-  
 770 expressing cells.

771 **(D)** Flow cytometry of the S-expressing cells. (Left) Representative histogram of the  
 772 S protein expression on the cell surface. The number in the histogram indicates the  
 773 mean fluorescence intensity (MFI). (Right) The MFI of surface S on the S-expressing  
 774 cells.

775 **(E-G)** SARS-CoV-2 S-based fusion assay. Effector cells (S-expressing cells) and  
 776 target cells (ACE2-expressing cells or ACE2/TMPRSS2-expressing cells) were  
 777 prepared, and the fusion activity was measured as described in **STAR★METHODS**.

778 **(E)** Kinetics of fusion activity (experimental data). Assays were performed in

779 quadruplicate, and fusion activity (arbitrary unit) is shown. (**F and G**) The kinetics  
780 of fusion velocity estimated by a mathematical model based on the kinetics of fusion  
781 activity data (see **STAR★METHODS**). (**G**) Initial velocity of the S-mediated fusion.  
782 In **B, D, and E**, statistically significant differences (\*,  $P < 0.05$ ) versus the D614G S  
783 were determined by Student's  $t$  test.  
784 In **F and G**, statistically significant differences (\*,  $P < 0.05$ ) versus the D614G S were  
785 determined by two-sided Welch's  $t$  test.

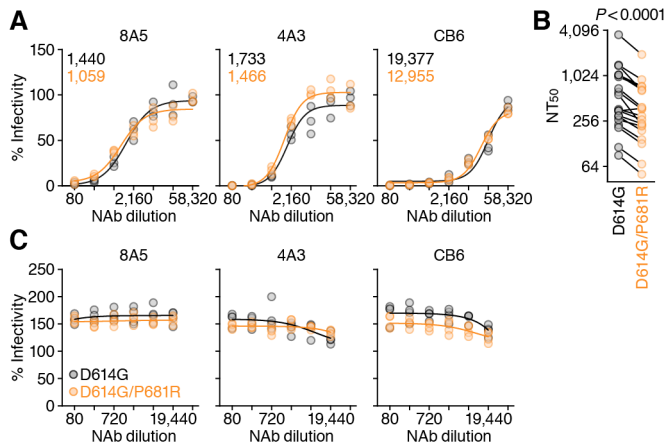

786

787

### Figure 5. Association of the P681R mutation on the sensitivity to NAb

788 Neutralization assay was performed by using three RBD-targeting monoclonal

789 antibodies (clones 8A5, 4A3 and CB6) (A and C) and 19 vaccinated sera (B). NAb

790 were used for the pseudovirus assay (A and B) and the S-based fusion assay (C).

791 Pseudoviruses and effector cells (S-expressing cells) were treated with serially

792 diluted NAb or sera as described in STAR★METHODS. The raw data of B is shown

793 in Figure S2. NT<sub>50</sub>, 50% neutralization titer.

794 In A, the NT<sub>50</sub> values of the D614G S (black) and D614G/P681R S (orange) are

795 indicated.

796 In B, a statistically significant difference versus the D614G virus was determined by

797 Wilcoxon matched-pairs signed rank test.

798 See also Figure S2.

799 **Table S1.** Number of daily deposited sequences in GISAID, related to Figure 1

800

801 **Table S2.** Percentage of the mutations detected in the S protein of the B.1.617  
802 lineage, related to Figure 1

803

804 **Table S3.** The SARS-CoV-2 genomic region encoded by each template and the  
805 primers used for the preparation of each fragment for CPER, related to Figure 2

806

807 **Table S4.** Primers used for the preparation of the expression plasmids for mutated  
808 SARS-CoV-2 S proteins, related to Figure 4

809

810 **STAR★METHODS**

811

812 **KEY RESOURCES TABLE**

813 **RESOURCE AVAILABILITY**

814 **Lead Contact**

815 Further information and requests for resources and reagents should be directed to  
816 and will be fulfilled by the Lead Contact, Kei Sato ([KeiSato@g.ecc.u-tokyo.ac.jp](mailto:KeiSato@g.ecc.u-tokyo.ac.jp)).

817

818 **Materials Availability**

819 All unique reagents generated in this study are listed in the Key Resources Table  
820 and available from the Lead Contact with a completed Materials Transfer Agreement.

821

822 **Data and Code Availability**

823 Additional Supplemental Items are available from Mendeley Data at <http://...>

824

825 **EXPERIMENTAL MODEL AND SUBJECT DETAILS**

826 **Ethics Statement**

827 For virus isolation, this study was approved by the Institutional Review Board of  
828 Tokyo Metropolitan Institute of Public Health, according to the Declaration of Helsinki  
829 2013 (approval number 3KenKenKen-466). For the use of human specimen, all  
830 protocols involving human subjects recruited at Kyoto University were reviewed and  
831 approved by the Institutional Review Boards of Kyoto University (approval number  
832 G0697). All human subjects provided written informed consent.

833

834 **Collection of BNT162b2-Vaccinated Sera**

835 Peripheral blood were collected four weeks after the second vaccination of  
836 BNT162b2 (Pfizer-BioNTech), and the sera of 19 vaccinees (average age: 38, range:  
837 28-59, 26% male) were isolated from peripheral blood. Sera were inactivated at 56°C  
838 for 30 min and stored at -80°C until use.

839

840 **Cell Culture**

841 HEK293 cells (a human embryonic kidney cell line; ATCC CRL-1573), HEK293T  
842 cells (a human embryonic kidney cell line; ATCC CRL-3216), and HOS cells (a  
843 human osteosarcoma cell line; ATCC CRL-1543) were maintained in Dulbecco's  
844 modified Eagle's medium (high glucose) (Wako, Cat# 044-29765) containing 10%  
845 fetal bovine serum (FBS) and 1% PS.

846 HOS-ACE2/TMPRSS2 cells, the HOS cells stably expressing human ACE2, was  
847 prepared as described previously (Ferreira et al., 2021; Ozono et al., 2021).

848 Vero cells [an African green monkey (*Chlorocebus sabaeus*) kidney cell line;  
849 JCRB0111] were maintained in Eagle's minimum essential medium (Wako, Cat#  
850 051-07615) containing 10% FBS and 1% PS.

851 VeroE6/TMPRSS2 cells [an African green monkey (*Chlorocebus sabaeus*) kidney  
852 cell line; JCRB1819] (Matsuyama et al., 2020) were maintained in Dulbecco's  
853 modified Eagle's medium (low glucose) (Wako, Cat# 041-29775) containing 10%  
854 FBS, G418 (1 mg/ml; Nacalai Tesque, Cat# G8168-10ML) and 1% PS.

855 HeLa-ACE2-TMPRSS2 cells (JCRB1835 (Kawase et al., 2012) were maintained in  
856 Dulbecco's modified Eagle's medium (low glucose) (Sigma-Aldrich, Cat# D6046-  
857 500ML) containing 10% FBS, 1 mg/ml G418 and 1% PS.

858 HEK293-C34 cells, the *IFNAR1* KO HEK293 cells expressing human ACE2 and  
859 TMPRSS2 by doxycycline treatment (Torii et al., 2021), were maintained in  
860 Dulbecco's modified Eagle's medium (high glucose) (Sigma-Aldrich, Cat# R8758-  
861 500ML) containing 10% FBS, 10 µg/ml blasticidin (InvivoGen, Cat# ant-bl-1) and 1%  
862 PS.

863

## 864 **METHOD DETAILS**

### 865 **Viral Genomes**

866 All SARS-CoV-2 genome sequences and annotation information used in this study  
867 were downloaded from GISAID (<https://www.gisaid.org>) as of May 31, 2021  
868 (1,761,037 sequences). We first excluded the genomes with non-human hosts. We  
869 obtained SARS-CoV-2 variants belonging to the B.1.617 lineage based on the  
870 PANGO annotation (i.e. sublineages B.1.617.1, B.1.617.2, or B.1.617.3) for each  
871 sequence in the GISAID metadata. Note that only one variant belonging to the  
872 B.1.617 lineage (GISAID ID: EPI\_ISL\_1544002 isolated in India on February 25,  
873 2021) was not used in the analysis because the variant is not assigned any three  
874 sublineages possibly due to 212 undetermined nucleotides in the genome. To infer  
875 epidemiology of the B.1.617 lineage (**Figure 1B-1F**), we excluded genomes that  
876 sampling date information are not available, and collected 2,855, 13,821, or 83  
877 sequences belonging to the B.1.617.1, B.1.617.2, or B.1.617.3 sublineage,  
878 respectively.

879

### 880 **Phylogenetic Analyses**

881 To infer the phylogeny of the B.1.617 sublineages, we screened SARS-CoV-2  
882 genomes by removing genomes containing undetermined nucleotides at coding  
883 regions. Since the number of genomes belonging to the sublineage B.1.617.1 or



884 B.1.617.2 are large (i.e. 894 or 6152 sequences, respectively), we used 150  
885 sequences randomly chosen for each sublineage. For the B.1.617.3 sublineage, 32  
886 genomes were used. We used Wuhan-Hu-1 strain isolated in China on December  
887 31, 2019 (GenBank ID: NC\_045512.2 and GISAID ID: EPI\_ISL\_402125) and LOM-  
888 ASST-CDG1 strain isolated Italy on February 20, 2020 (GISAID ID:  
889 EPI\_ISL\_412973) as an outgroup. We then collected 334 representative SARS-  
890 CoV-2 sequences, and aligned entire genome sequences by using the FFT-NS-1  
891 program in MAFFT suite v7.407 (Kato and Standley, 2013). All sites with gaps in  
892 alignment are removed, and the total length of alignment is 29,085 nucleotides.  
893 Maximum likelihood tree was generated by IQ-TREE 2 v2.1.3 software with 1,000  
894 bootstraps (Minh et al., 2020). GTR+G substitution model is utilized based on BIC  
895 criterion.

896

### 897 **SARS-CoV-2 Preparation and Titration**

898 Two viral isolates belonging to the B.1.617 lineage, B.1.617.1 (GISAID ID:  
899 EPI\_ISL\_2378733) and B.1.617.2 (GISAID ID: EPI\_ISL\_2378732) and a D614G-  
900 bearing B.1.1 isolate (GISAID ID: EPI\_ISL\_479681) were isolated from SARS-CoV-  
901 2-positive individuals in Japan. Briefly, 100 µl of the nasopharyngeal swab obtained  
902 from SARS-CoV-2-positive individuals were inoculated into VeroE6/TMPRSS2 cells  
903 in the biosafety level 3 laboratory. After the incubation at 37°C for 15 minutes, a  
904 maintenance medium supplemented with Eagle's minimum essential medium  
905 (FUJIFILM Wako Pure Chemical Corporation, Cat# 056-08385) including 2% FBS  
906 and 1% PS was added, and the cells were cultured at 37°C under 5% CO<sub>2</sub>. The  
907 cytopathic effect (CPE) was confirmed under an inverted microscope (Nikon), and  
908 the viral load of the culture supernatant in which CPE was observed was confirmed  
909 by real-time RT-PCR. To determine viral genome sequences, RNA was extracted  
910 from the culture supernatant using QIAamp viral RNA mini kit (Qiagen, Qiagen, Cat#  
911 52906). cDNA library was prepared by using NEB Next Ultra RNA Library Prep Kit  
912 for Illumina (New England Biolab, Cat# E7530) and whole genome sequencing was  
913 performed by MiSeq (Illumina).

914 To prepare the working virus, 100 µl of the seed virus was inoculated into  
915 VeroE6/TMPRSS2 cells (5,000,000 cells in a T-75 flask). At one hour after infection,  
916 the culture medium was replaced with Dulbecco's modified Eagle's medium (low  
917 glucose) (Wako, Cat# 041-29775) containing 2% FBS and 1% PS; at 2-3 days  
918 postinfection, the culture medium was harvested and centrifuged, and the  
919 supernatants were collected as the working virus.

920 The titer of the prepared working virus was measured as 50% tissue culture  
921 infectious dose (TCID<sub>50</sub>). Briefly, one day prior to infection, VeroE6/TMPRSS2 cells

922 (10,000 cells/well) were seeded into a 96-well plate. Serially diluted virus stocks were  
923 inoculated to the cells and incubated at 37°C for 3 days. The cells were observed  
924 under microscopy to judge the CPE appearance. The value of TCID<sub>50</sub>/ml was  
925 calculated with the Reed–Muench method ([Reed and Muench, 1938](#)).

926

### 927 **SARS-CoV-2 Infection**

928 One day prior to infection, Vero cells (10,000 cells), VeroE6/TMPRSS2 cells (10,000  
929 cells), HeLa-ACE2/TMPRSS2 cells (10,000 cells) were seeded into a 96-well plate.  
930 SARS-CoV-2 (100 TCID<sub>50</sub>) was inoculated and incubated at 37°C for 1 h. The  
931 infected cells were washed, and 180 µl of culture medium was added. The culture  
932 supernatant (10 µl) was harvested at indicated time points and used for real-time  
933 RT-PCR to quantify the viral RNA copy number. To monitor the syncytia formed in  
934 infected cell culture, the bright-field photos were obtained using ECLIPSE Ts2  
935 (Nikon). The size of floating syncytia was measured by "quick selection tool" in  
936 Photoshop CS5 (Adobe) as pixel, and the area of floating syncytia was calculated  
937 from the pixel value.

938

### 939 **Immunofluorescence Staining**

940 One day prior to infection, VeroE6/TMPRSS2 cells (200,000 cells) were seeded on  
941 the coverslips put in 12-well plate and were infected with SARS-CoV-2 at MOI 0.01.  
942 At 48 hours postinfection, the cells were fixed with 4% paraformaldehyde in  
943 phosphate buffer saline (PBS) (Nacalai Tesque, Cat# 09154-85) for 10 min at room  
944 temperature. The fixed cells were permeabilized with 0.1% Triton X-100 in PBS for  
945 10 min, blocked with 10% FBS in PBS for overnight at 4°C, and then stained using  
946 mouse anti-SARS-CoV-2 N monoclonal antibody (GeneTex, Cat# GTX632269) for  
947 1 h. After washing three times with PBS, cells were incubated with an Alexa 488-  
948 conjugated anti-mouse IgG antibody (Jackson ImmunoResearch, Cat# 015-540-  
949 003) for 1 h. Nuclei were stained with Hoechst 33342 (Thermo Fisher Scientific, Cat#  
950 H3570). The coverslips were mounted on glass slides using Fluoromount-G  
951 (Southern Biotechnology, Cat# 0100-01) with Hoechst 33342. Fluorescence  
952 microscopy was performed on a confocal laser microscope (A1RSi, Nikon) and  
953 captured with NIS-Elements AR software (Nikon). The area of N-positive cells was  
954 quantified using Fiji software implemented in Image J.

955

### 956 **SARS-CoV-2 Reverse Genetics**

957 Recombinant SARS-CoV-2 was generated by circular polymerase extension  
958 reaction (CPE) as previously described ([Motozono et al., 2021](#); [Torii et al., 2021](#)).  
959 In brief, 9 DNA fragments encoding the partial genome of SARS-CoV-2 (strain WK-

960 521, PANGO lineage A; GISAID ID: EPI\_ISL\_408667) ([Matsuyama et al., 2020](#))  
961 were prepared by PCR using PrimeSTAR GXL DNA polymerase (Takara, cat#  
962 R050A). A linker fragment encoding hepatitis delta virus ribozyme, bovine growth  
963 hormone polyA signal and cytomegalovirus promoter was also prepared by PCR.  
964 The corresponding SARS-CoV-2 genomic region and the templates and primers of  
965 this PCR are summarized in **Table S3**. The 10 obtained DNA fragments were mixed  
966 and used for CPER ([Torii et al., 2021](#)).

967 To produce recombinant SARS-CoV-2, the CPER products were  
968 transfected into HEK293-C34 cells using TransIT-LT1 (Takara, cat# MIR2300)  
969 according to the manufacturer's protocol. At one day posttransfection, the culture  
970 medium was replaced with Dulbecco's modified Eagle's medium (high glucose)  
971 (Sigma-Aldrich, cat# R8758-500ML) containing 2% FCS, 1% PS and doxycycline (1  
972 µg/ml; Takara, cat# 1311N). At six days posttransfection, the culture medium was  
973 harvested and centrifuged, and the supernatants were collected as the seed virus.  
974 To remove the CPER products (i.e., SARS-CoV-2-related DNA), 1 ml of the seed  
975 virus was treated with 2 µl TURBO DNase (Thermo Fisher Scientific, cat# AM2238)  
976 and incubated at 37°C for 1 h. Complete removal of the CPER products (i.e., SARS-  
977 CoV-2-related DNA) from the seed virus was verified by PCR. The working virus was  
978 prepared by using the seed virus as described above.

979 To generate recombinant SARS-CoV-2 mutants, mutations were inserted  
980 in fragment 8 (**Table S3**) using the GENEART site-directed mutagenesis system  
981 (Thermo Fisher Scientific, cat# A13312) according to the manufacturer's protocol  
982 with the following primers: Fragment 8\_S D614G forward, 5'-CCA GGT TGC TGT  
983 TCT TTA TCA GGG TGT TAA CTG CAC AGA AGT CCC TG-3'; Fragment 8\_S  
984 D614G reverse, 5'- CAG GGA CTT CTG TGC AGT TAA CAC CCT GAT AAA GAA  
985 CAG CAA CCT GG -3'; Fragment 8\_S P681R forward, 5'-AGA CTC AGA CTA ATT  
986 CTC GTC GGC GGG CAC GTA GTG TA-3'; and Fragment 8\_S P681R reverse, 5'-  
987 TAC ACT ACG TGC CCG CCG ACG AGA ATT AGT CTG AGT CT-3', according to  
988 the manufacturer's protocol. Nucleotide sequences were determined by a DNA  
989 sequencing service (Fasmac), and the sequence data were analyzed by  
990 Sequencher version 5.1 software (Gene Codes Corporation). The CPER for the  
991 preparation of SARS-CoV-2 mutants was performed using mutated fragment 8  
992 instead of parental fragment 8. Subsequent experimental procedures correspond to  
993 the procedure for parental SARS-CoV-2 preparation (described above). To verify  
994 insertion of the mutation in the working viruses, viral RNA was extracted using a  
995 QIAamp viral RNA mini kit (Qiagen, cat# 52906) and reverse transcribed using  
996 SuperScript III reverse transcriptase (Thermo Fisher Scientific, cat# 18080085)  
997 according to the manufacturers' protocols. DNA fragments including the mutations

998 inserted were obtained by RT-PCR using PrimeSTAR GXL DNA polymerase  
999 (Takara, cat# R050A) and the following primers: WK-521 23339-23364 forward, 5'-  
1000 GGT GGT GTC AGT GTT ATA ACA CCA GG-3'; and WK-521 24089-24114 reverse,  
1001 5'-CAA ATG AGG TCT CTA GCA GCA ATA TC-3'. Nucleotide sequences were  
1002 determined as described above, and sequence chromatograms (**Figure 2A**) were  
1003 visualized using the web application Tracy (<https://www.gear-genomics.com/teal/>)  
1004 ([Rausch et al., 2020](#)).

1005

### 1006 **Real-Time RT-PCR**

1007 Real-time RT-PCR was performed as previously described ([Motozono et al., 2021](#);  
1008 [Shema Mugisha et al., 2020](#)). Briefly, 5 µl of culture supernatant was mixed with 5  
1009 µl of 2 × RNA lysis buffer [2% Triton X-100, 50 mM KCl, 100 mM Tris-HCl (pH 7.4),  
1010 40% glycerol, 0.8 U/µl recombinant RNase inhibitor (Takara, cat# 2313B)] and  
1011 incubated at room temperature for 10 min. RNase-free water (90 µl) was added, and  
1012 the diluted sample (2.5 µl) was used as the template for real-time RT-PCR performed  
1013 according to the manufacturer's protocol using the One Step TB Green PrimeScript  
1014 PLUS RT-PCR kit (Takara, cat# RR096A) and the following primers: Forward *N*, 5'-  
1015 AGC CTC TTC TCG TTC CTC ATC AC-3'; and Reverse *N*, 5'-CCG CCA TTG CCA  
1016 GCC ATT C-3'. The copy number of viral RNA was standardized with a SARS-CoV-  
1017 2 direct detection RT-qPCR kit (Takara, cat# RC300A). The fluorescent signal was  
1018 acquired using a QuantStudio 3 Real-Time PCR system (Thermo Fisher Scientific),  
1019 a CFX Connect Real-Time PCR Detection system (Bio-Rad) or a 7500 Real Time  
1020 PCR System (Applied Biosystems).

1021

### 1022 **Plasmid Construction**

1023 A plasmid expressing the SARS-CoV-2 S D614G protein was prepared in our  
1024 previous study ([Ozono et al., 2021](#)). A plasmid expressing the SARS-CoV-2  
1025 D614G/P681R S protein (pC-S-D614G/P681R) was generated by site-directed  
1026 mutagenesis PCR using pC-SARS2-S D614G ([Ozono et al., 2021](#)) as the template  
1027 and the following primers listed in **Table S4**. The resulting PCR fragment was  
1028 digested with KpnI and NotI and inserted into the KpnI-NotI site of the pCAGGS  
1029 vector ([Niwa et al., 1991](#)).

1030

### 1031 **Pseudovirus Assay**

1032 Pseudovirus assay was performed as previously described ([Motozono et al., 2021](#);  
1033 [Ozono et al., 2021](#)). Briefly, the pseudoviruses, lentivirus (HIV-1)-based, luciferase-  
1034 expressing reporter viruses pseudotyped with the SARS-CoV-2 S protein and its  
1035 derivatives, HEK293T cells ( $1 \times 10^6$  cells) were cotransfected with 1 µg of psPAX2-

1036 IN/HiBiT (Ozono et al., 2020), 1 µg of pWPI-Luc2 (Ozono et al., 2020), and 500 ng  
1037 of plasmids expressing parental S or its derivatives using Lipofectamine 3000  
1038 (Thermo Fisher Scientific, Cat# L3000015) or PEI Max (Polysciences, Cat# 24765-  
1039 1) according to the manufacturer's protocol. At two days posttransfection, the culture  
1040 supernatants were harvested, centrifuged. The amount of pseudoviruses prepared  
1041 was quantified using the HiBiT assay as previously described (Ozono et al., 2021;  
1042 Ozono et al., 2020). The pseudoviruses prepared were stored at -80°C until use.  
1043 For the experiment, HOS-ACE2 cells and HOS-ACE2/TMPRSS2 cells (10,000  
1044 cells/50 µl) were seeded in 96-well plates and infected with 100 µl of the  
1045 pseudoviruses prepared at 4 different doses. At two days postinfection, the infected  
1046 cells were lysed with a One-Glo luciferase assay system (Promega, Cat# E6130),  
1047 and the luminescent signal was measured using a CentroXS3 plate reader  
1048 (Berthold Technologies) or GloMax explorer multimode microplate reader 3500  
1049 (Promega).

1050

#### 1051 **Western blotting**

1052 Western blotting was performed as previously described (Ikeda et al., 2019; Ikeda  
1053 et al., 2018; Sultana et al., 2019). To quantify the level of the cleaved S2 protein in  
1054 the cells, the harvested cells were washed and lysed in lysis buffer [25 mM HEPES  
1055 (pH 7.2), 20% glycerol, 125 mM NaCl, 1% Nonidet P40 substitute (Nalacai Tesque,  
1056 Cat# 18558-54), protease inhibitor cocktail (Nalacai Tesque, Cat# 03969-21)]. After  
1057 quantification of total protein by protein assay dye (Bio-Rad, Cat# 5000006), lysates  
1058 were diluted with 2 × sample buffer [100 mM Tris-HCl (pH 6.8), 4% SDS, 12% β-  
1059 mercaptoethanol, 20% glycerol, 0.05% bromophenol blue] and boiled for 10 min.  
1060 Ten microliter of the samples (50 µg of total protein) were subjected to western  
1061 blotting. To quantify the level of the cleaved S2 protein on virions, 900 µl of the  
1062 culture medium including the pseudoviruses were layered onto 500 µl of 20%  
1063 sucrose in PBS and centrifuged at 20,000 × g for 2 h at 4°C. Pelleted virions were  
1064 resuspended in 1× NuPAGE LDS sample buffer (Thermo Fisher Scientific, Cat#  
1065 NP0007) containing 2% β-mercaptoethanol, and the lysed virions were subjected to  
1066 western blotting. For the protein detection, following antibodies were used: mouse  
1067 anti-SARS-CoV-2 S monoclonal antibody (clone 1A9, GeneTex, Cat# GTX632604),  
1068 rabbit anti-ACTB monoclonal antibody (clone 13E5, Cell Signaling, Cat# 4970),  
1069 mouse anti-HIV-1 p24 monoclonal antibody (clone 183-H12-5C, obtained from the  
1070 HIV Reagent Program, NIH, Cat# ARP-3537), horseradish peroxidase (HRP)-  
1071 conjugated donkey anti-rabbit IgG polyclonal antibody (Jackson ImmunoResearch,  
1072 Cat# 711-035-152), and HRP-conjugated donkey anti-mouse IgG polyclonal  
1073 antibody (Jackson ImmunoResearch, Cat# 715-035-150). Chemiluminescence was



1074 detected using SuperSignal West Femto Maximum Sensitivity Substrate (Thermo  
1075 Fisher Scientific, Cat# 34095) or Western BLoT Ultra Sensitive HRP Substrate  
1076 (Takara, Cat# T7104A) according to the manufacturers' instruction. Bands were  
1077 visualized using the image analyzer, Amersham Imager 600 (GE Healthcare), and  
1078 the band intensity was quantified using Image Studio Lite (LI-COR Biosciences) or  
1079 Image J.

1080

### 1081 **SARS-CoV-2 S-Based Fusion Assay**

1082 The SARS-CoV-2 S-based fusion assay was performed as previously described  
1083 ([Motozono et al., 2021](#)). This assay utilizes a dual split protein (DSP) encoding  
1084 *Renilla* luciferase (RL) and *GFP* genes, and the respective split proteins, DSP<sub>1-7</sub> and  
1085 DSP<sub>8-11</sub>, are expressed in effector and target cells by transfection ([Ikeda et al., 2018](#);  
1086 [Kondo et al., 2011](#)). Briefly, on day 1, effector cells (i.e., S-expressing cells) and  
1087 target cells (i.e., ACE2-expressing cells) were prepared at a density of 0.6 to 0.8 ×  
1088 10<sup>6</sup> cells in a 6 well plate. To prepare effector cells, HEK293 cells were cotransfected  
1089 with the expression plasmids for D614G S or D614G/P681R (400 ng) with pDSP<sub>1-7</sub>  
1090 (400 ng) using TransIT-LT1 (Takara, Cat# MIR2300). To prepare target cells,  
1091 HEK293 cells were cotransfected with pC-ACE2 (200 ng) and pDSP<sub>8-11</sub> (400 ng). In  
1092 addition to the plasmids above, selected wells of target cells were also cotransfected  
1093 with pC-TMPRSS2 (40 ng). On day 3 (24 h posttransfection), 16,000 effector cells  
1094 were detached and reseeded into 96-well black plates (PerkinElmer, Cat# 6005225),  
1095 and target cells were reseeded at a density of 1,000,000 cells/2 ml/well in 6-well  
1096 plates. On day 4 (48 h posttransfection), target cells were incubated with EnduRen  
1097 live cell substrate (Promega, Cat# E6481) for 3 h and then detached, and 32,000  
1098 target cells were applied to a 96-well plate with effector cells. RL activity was  
1099 measured at the indicated time points using a Centro XS3 LB960 (Berthold  
1100 Technologies). The S proteins expressed on the surface of effector cells were  
1101 stained with rabbit anti-SARS-CoV-2 S monoclonal antibody (GeneTex, Cat#  
1102 GTX635654) and APC-conjugated goat anti-rabbit IgG polyclonal antibody (Jackson  
1103 ImmunoResearch, Cat# 111-136-144). Normal rabbit IgG (SouthernBiotech, Cat#  
1104 0111-01) was used as a negative control. Expression levels of surface S proteins  
1105 were analyzed using a FACS Canto II (BD Biosciences). RL activity was normalized  
1106 to the mean fluorescence intensity (MFI) of surface S proteins, and the normalized  
1107 values are shown as fusion activity.

1108

### 1109 **Mathematical Modeling for Fusion Velocity Quantification**

1110 The following cubic polynomial regression model was employed to fit each of time-  
1111 series datasets (**Figure 4E**):



1112

1113  $y \sim b_0 + b_1x + b_2x^2 + b_3x^3$

1114

1115 The initial velocity of cell fusion was estimated from the derivative of the fitted cubic  
1116 curve.

1117

### 1118 **Neutralization Assay**

1119 Virus neutralization assay was performed on HOS-ACE2/TMPRSS2 cells using the  
1120 SARS-CoV-2 S pseudoviruses expressing luciferase (see "Pseudovirus Assay"  
1121 above). The viral particles pseudotyped with D614G S or D614G/P681R S were  
1122 incubated with serial dilution of heat-inactivated human serum samples or the RBD-  
1123 targeting NAbs (clones 8A5, 4A3 and CB6; Elabscience) at 37°C for 1 h. The  
1124 pseudoviruses without sera and NAbs were also included. Then, the 80 µl mixture  
1125 of pseudovirus and sera/NAbs was added into HOS-ACE2/TMPRSS2 cells (10,000  
1126 cells/50 µl) in a 96-well white plate and the luminescence was measured as  
1127 described above (see "Pseudovirus Assay" above). 50% neutralization titer (NT<sub>50</sub>)  
1128 was calculated using Prism 9 (GraphPad Software).

1129 For the cell-cell fusion neutralization assay, effector cells of the S-based  
1130 fusion assay (i.e., S-expressing cells) were incubated with the serially diluted  
1131 neutralizing antibodies targeting RBD (clones 8A5, 4A3 and CB6; Elabscience) at  
1132 37°C for 1 h. Then, target cells were applied and performed the S-based fusion  
1133 assay as described above (see "SARS-CoV-2 S-Based Fusion Assay" above).

1134

### 1135 **QUANTIFICATION AND STATISTICAL ANALYSIS**

1136 Data analyses were performed using Prism 9 (GraphPad Software). Data are  
1137 presented as average with SD. In the figures except **Figure 5B**, n represents the  
1138 number of technical replicate. In Figure 5B, n represents the number of serum donor.  
1139 In **Figure 2A, 3B, 4B, 4D, 4E**, statistically significant differences were determined  
1140 by Student's t test.

1141 In **Figures 2B and 2C**, statistically significant differences were determined by the  
1142 Mann-Whitney U test.

1143 In **Figures 4F and 4G**, statistically significant differences were determined by were  
1144 determined by two-sided Welch's *t* test.

1145 In **Figure 5B**, a statistically significant difference was determined by Wilcoxon  
1146 matched-pairs signed rank test.
